1 **DUX4 regulates oocyte to embryo transition in human**

2

3 Sanna Vuoristo<sup>1,2#\*</sup>, Christel Hydén-Granskog<sup>3</sup>, Masahito Yoshihara<sup>1</sup>, Shruti

4 Bhagat<sup>1,4</sup>, Lisa Gawriyski<sup>5</sup>, Eeva-Mari Jouhilahti<sup>6</sup>, Anastassius Damdimopoulos<sup>7</sup>,

5 Vipin Ranga<sup>8</sup>, Mahlet Tamirat<sup>8</sup>, Mikko Huhtala<sup>8</sup>, Kosuke Hashimoto<sup>4</sup>, Kaarel

6 Krjutškov<sup>1,6,9,10</sup>, Gaëlle Recher<sup>11</sup>, Sini Ezer<sup>6,12</sup>, Priit Paluoja<sup>9,13</sup>, Pauliina Paloviita<sup>2</sup>,

7 Yujiro Takegami<sup>14</sup>, Ai Kanemaru<sup>14</sup>, Karolina Lundin<sup>2</sup>, Tomi Airene<sup>8</sup>, Timo

8 Otonkoski<sup>6,15</sup>, Juha S. Tapanainen<sup>2,3,16</sup>, Hideya Kawaji<sup>4,17,18</sup>, Yasuhiro Murakawa<sup>4,19</sup>,

9 Thomas R. Bürglin<sup>20</sup>, Markku Varjosalo<sup>5</sup>, Mark S. Johnson<sup>8</sup>, Timo Tuuri<sup>2,3</sup>, Shintaro

10 Katayama<sup>1,12\*</sup> and Juha Kere<sup>1,6,12\*</sup>

11

12 <sup>1</sup>Karolinska Institutet, Department of Biosciences and Nutrition, Huddinge, Sweden

13 <sup>2</sup>University of Helsinki, Department of Obstetrics and Gynecology, Helsinki, Finland

14 <sup>3</sup>Helsinki University Hospital, Department of Obstetrics and Gynecology, Helsinki,

15 Finland

16 <sup>4</sup>RIKEN Center for Integrative Medical Sciences, Yokohama, Japan

17 <sup>5</sup>University of Helsinki, Institute of Biotechnology, Helsinki, Finland

18 <sup>6</sup>Stem Cells and Metabolism Research Program, University of Helsinki, Finland

19 <sup>7</sup>Karolinska Institutet, Bioinformatics and Expression Analysis Core Facility,

20 Huddinge, Sweden

21 <sup>8</sup>Structural Bioinformatics Laboratory, Biochemistry, Faculty of Science and

22 Engineering, Åbo Akademi University, Turku, Finland

23 <sup>9</sup>Competence Centre for Health Technologies, Tartu, Estonia

24 <sup>10</sup>Department of Obstetrics and Gynecology, Institute of Clinical Medicine, University  
25 of Tartu; Tartu, Estonia

26 <sup>11</sup>Institut d'Optique Graduate School, CNRS - Université de Bordeaux, Talence, France

27 <sup>12</sup>Folkhälsan Research Center, Helsinki, Finland

28 <sup>13</sup>Institute of Computer Science, University of Tartu, Tartu, Estonia

29 <sup>14</sup>K.K. DNAFORM, Yokohama, Japan

30 <sup>15</sup>Children's Hospital, Helsinki University Hospital and University of Helsinki, Finland

31 <sup>16</sup>Oulu University Hospital, Oulu, Finland

32 <sup>17</sup>RIKEN Preventive Medicine and Diagnosis Innovation Program, Wako, Japan

33 <sup>18</sup>Tokyo Metropolitan Institute of Medical Science, Tokyo, Japan

34 <sup>19</sup>IFOM, The FIRC Institute of Molecular Oncology, Milan, Italy

35 <sup>20</sup>University of Basel, Department of Biomedicine, Basel, Switzerland

36

37

38 #Current affiliation

39 \*Corresponding author

40

41

42

43



44 **Abstract**

45

46 **During the human oocyte-to-embryo transition, the fertilized oocyte undergoes**  
47 **final maturation and the embryo genome is gradually activated during the first**  
48 **three cell divisions. How this transition is coordinated in humans is largely**  
49 **unknown. We show that the double homeodomain transcription factor DUX4**  
50 **contributes to this transition. DUX4 knockdown in human zygotes caused**  
51 **insufficient transcriptome reprogramming as observed three days after**  
52 **fertilization. Induced DUX4 expression in human embryonic stem cells activated**  
53 **transcription of thousands of newly identified bi-directional transcripts, including**  
54 **putative enhancers for embryonic genome activation genes such as LEUTX. DUX4**  
55 **protein interacted with transcriptional modifiers that are known to couple**  
56 **enhancers and promoters. Taken together, our results reveal that DUX4 is a**  
57 **pioneer regulating oocyte-to-embryo transition in human through activation of**  
58 **intergenic genome, especially enhancers, and hence setting the stage for early**  
59 **human embryo development.**

60

61

62

63

64

65

66 Mammalian pre-implantation development commences with oocyte-to-embryo  
67 transition, which involves fundamental changes in the epigenetic landscapes,  
68 modulation of cell cycle control, and translation or clearance of selected maternal  
69 mRNAs, culminating to embryonic genome activation<sup>1,2</sup>. The pioneer regulators  
70 orchestrating the oocyte-to-embryo transition and first embryo genome activation steps  
71 in human remain poorly understood. The conserved double homeodomain transcription  
72 factor *DUX4* represents a plausible candidate regulating the oocyte-to-embryo  
73 transition in humans, given its capacity to activate germline genes and genomic repeat  
74 elements<sup>3-5</sup>. Here we show that *DUX4* is able to launch the first reprogramming steps  
75 from oocyte to embryo in human by activating thousands of novel enhancers and  
76 therein, modulating the transcriptome and chromatin. Human *DUX4* knockdown  
77 embryos are viable until the third day of development, but their transcriptome is  
78 severely altered. Our proteomics approaches suggest that DUX4 binds to Mediator  
79 complex and chromatin modifiers through its C-terminal domains, providing a likely  
80 explanation to how DUX4 may extensively modulate the genome. This study implies a  
81 wider role for *DUX4* as a cellular gate keeper acting both as a general genomic modifier  
82 of cell fate as well as a specific inducer of first wave embryo genome activation genes.

83

## 84 **Results**

### 85 *Quantification of DUX4 in human embryos*

86 The DUX4 induced gene network is highly conserved<sup>6</sup> and recent reports showed that  
87 DUX4 is expressed in early human embryos<sup>3,4</sup>. However, details of this dynamic  
88 process, including initiation of *DUX4* expression, remained ambiguous. Therefore, we

89 first set out to quantify *DUX4* mRNA expression levels in human metaphase II (MII)  
90 oocytes, zygotes, and cleavage embryos as well as *DUX4* protein levels in human  
91 zygotes and early embryos (Fig. 1a). We found significant *DUX4* mRNA upregulation  
92 in zygotes, while few transcripts were found in MII oocytes or cleavage embryos<sup>7</sup> (Fig.  
93 1b). Induction of the *DUX4* mRNA orthologues in mouse and non-human primate  
94 zygotes is evolutionary conserved (Extended Data Fig.1a). Antibody staining revealed  
95 that *DUX4* protein is highly abundant in the cytoplasm and nuclei of zygotes as well as  
96 2-cell and 4-cell embryos (Fig. 1c). Quantification of the nuclear *DUX4* staining  
97 intensities in 3D showed a variable but increasing nuclear signal from the zygotes up  
98 to 4-cell embryos, while almost no signal was detected in 8-cell embryos (Fig 1c, d). In  
99 one single very early 8-cell stage embryo there was high variability in the nuclear  
100 *DUX4* staining, consistent with rapid clearance of the *DUX4* protein (Extended Data  
101 Fig. 1b). These results demonstrate that *DUX4* transcripts appear around the time of  
102 fertilisation and is followed by cytoplasmic and nuclear localisation of the *DUX4*  
103 protein during the first two days of human embryo development coinciding with the  
104 timeframe of the oocyte-to-embryo transition and activation of the genome.

105

#### 106 *Inhibition of DUX4 in human zygotes*

107 Given the short-term and precise manifestation of *DUX4* mRNA and protein in human  
108 zygotes and early cleavage stage embryos, we next asked how *DUX4* regulates the first  
109 steps of human embryo development. We microinjected either *DUX4* targeting siRNA  
110 (si*DUX4*) or control siRNA (siCTRL) into triploid human zygotes and followed their  
111 development for 48 h after the microinjections, until the third day of development (Fig.  
112 1e). Staining of the *DUX4* protein was very faint or absent in the si*DUX4* embryos but  
113 strongly positive in the siCTRL embryos 24 h after microinjection (Fig. 1f), confirming

114 that the *DUX4* targeting siRNA efficiently down-regulated *DUX4* expression. The cells  
115 from the microinjected embryos were collected 48 h after microinjections and  
116 sequenced for identification of transcript far 5'-ends (TFEs), which represent  
117 transcription start sites of polyA-tailed RNAs<sup>8</sup>. Group-wise comparison suggested that  
118 a number of TFEs were upregulated in the siDUX4 embryos (Fig. 1g, Supplementary  
119 Information 1). We annotated the upregulated TFEs and compared them to our  
120 published gene expression data set<sup>7,8</sup> on human MII oocytes, zygotes, and cleavage  
121 cells. These analyses revealed that a large number of mRNAs enriched in siDUX4  
122 embryos were normally down-regulated during transition from oocytes or zygotes to 4-  
123 cell embryos (Fig. 1h, i) and from 4-cell embryos to 8-cell embryos (Fig 1j). The most  
124 differentially expressed genes between the siCTRL and siDUX4 blastomeres were  
125 maternal genes, such as *GDF9*<sup>9</sup> and *ZP1* and *ZP2*<sup>10</sup> (Fig. 1k). In agreement with the  
126 presence of maternal transcripts, gene expression enrichment analysis using TopAnat<sup>11</sup>  
127 for the genes retained in the siDUX4 embryos resulted in terms such as 'female germ  
128 cell' and 'oocyte' (Extended Data Fig. 2a). Thus, maternal genes that normally undergo  
129 targeted clearance during the oocyte-to-embryo transition were retained after the  
130 knock-down of *DUX4* in human zygotes. Investigating further, we identified 3,196  
131 TFEs that are highly variable between the microinjected blastomeres. Weighted  
132 correlation network analysis (WGCNA)<sup>12</sup> classified these variable TFEs into three  
133 modules: TFEs in blue and brown modules overlapped with the upregulated TFEs  
134 during normal pre-implantation development<sup>8</sup>, suggesting embryonic genome  
135 activation modules, while the TFEs in the turquoise module were associated with  
136 maternal genes (Extended Data Fig. 2b). According to the representative expression  
137 pattern, siDUX4 blastomeres did not upregulate the genome activation module TFEs  
138 (Extended Data Fig. 2c), suggesting insufficient activation of their genome due to

139 *DUX4* knock-down. Although retroelement-derived transcription by *DUX4* binding has  
140 been reported<sup>13</sup>, only a few genome activation module TFEs overlapped with the 56  
141 families of repeat elements and known *DUX4* binding sites (Extended Data Fig. 2d).  
142 Surprisingly, TFEs in the maternal turquoise module overlapped with ERVL/ERVL-  
143 MaLR elements and the known *DUX4* binding sites (Extended Data Fig. 3d;  $P < 0.05$   
144 by Fisher's exact test, the odds ratio  $> 1$ ;  $P$ -values were corrected by Benjamini-  
145 Hochberg procedure). However, they only represented up to 5% of the maternal TFEs.  
146 Therefore, *DUX4* does not seem to regulate maternal TFEs (turquoise module) through  
147 ERVL-MaLR promoter elements.

148

#### 149 *Transcriptome changes induced by DUX4*

150 To investigate *DUX4* functions, we transfected two human embryonic stem cell (hESC)  
151 lines H1 and H9 with *DUX4*-EmGFP TetOn constructs (Fig. 2a and Extended Data Fig.  
152 3a-d) and analysed transcriptome and chromatin status after inducing *DUX4* expression  
153 using doxycycline. Of the previously reported 32 minor genome activation TFEs<sup>8</sup>, 23  
154 (~72%) including *ZSCAN4*, *TRIM48*, *LEUTX*<sup>14</sup>, and 3 previously unannotated genes  
155 (Extended Data Fig. 4) were significantly upregulated in the EmGFP (+) cells (Fig. 2b,  
156 Supplementary Information 2). About 74% (17/23) of the promoters of these TFEs  
157 contained *DUX4* binding sites<sup>5,13</sup> (Fig. 2c). Both, a *de novo* DNA motif, which was  
158 highly similar to the known *DUX4* motif, and the known binding site were enriched at  
159 the proximal upstream sequence of the upregulated TFEs (Fig. 2d, e). Furthermore, the  
160 promoter regions of these transcripts were remarkably overrepresented with *DUX4*  
161 binding sites among hundreds of transcription factors (Extended Data Fig. 3e). In  
162 contrast, only ~11% (14/128) of the major embryo genome activation TFEs were up-

163 regulated (Fig. 2c), suggesting that DUX4 acts only as an inducer of the minor genome  
164 activation genes. According to the classification of the differentially regulated TFEs,  
165 the vast majority of the upregulated TFEs were mapped to intergenic regions of the  
166 genome and the majority of the downregulated TFEs were mapped to the coding  
167 regions of the genome (Fig. 2f). We compared these unannotated TFEs upregulated by  
168 DUX4 induction with FANTOM-CAT non-coding RNA database and found that 430  
169 TFEs overlapped with 394 long non-coding RNA (lncRNA) exons out of which 46  
170 were antisense lncRNAs. About 42% (1,844/4,415) of the TFEs overlapped with the  
171 ERVL-MaLR elements. Finally, we studied the chromatin status of the EmGFP (+) and  
172 EmGFP (-) *DUX4* TetOn hESCs using ATAC-sequencing. *DUX4* caused rapid  
173 chromatin opening (hereafter referred to as ATAC-gained) in the EmGFP (+) cells. Out  
174 of these ATAC-gained chromatin sites, 48.9% significantly overlapped with ERVL-  
175 MaLR elements and they were enriched for the DUX4 binding sites (55.8%  $P < 2.2e-$   
176 16) (Fig. 2g). The ATAC-gained ERVL-MaLR regions remarkably overlapped with the  
177 open chromatin regions found in 2-cell human embryos<sup>15</sup> (Extended Data Fig. 3f). Out  
178 of the DUX4-induced gained chromatin regions that overlapped with those of the 2-cell  
179 embryos and DUX4 binding sites, 76.7% were unannotated. This suggests that DUX4  
180 is a strong modulator of the intergenic genome immediately after fertilization.

181

### 182 *Induction of embryonic genome activation by DUX4 driven enhancers*

183

184 Substantial upregulation of intergenic genomic regions after *DUX4* induction (Fig. 2f)  
185 prompted us to study transcribed enhancers in the *DUX4* TetOn hESCs (Fig. 3a). For  
186 this, we investigated native elongating transcripts using cap analysis of gene expression

187 (NET-CAGE)<sup>16</sup>, which sensitively identifies unstable transcripts such as enhancer  
188 RNAs (Extended Data Fig. 5a, b). Integration of our TetOn *DUX4* hESC ATAC-seq  
189 and NET-CAGE datasets (Fig. 2a and 3a) showed that open chromatin regions were  
190 highly enriched at the nucleosome depleted regions of *DUX4* induced (Dox+)  
191 enhancers but not at enhancers identified in the Dox (-) hESCs (Extended Data Fig. 5c).  
192 Altogether, we identified more than 10,000 transcribed enhancers in our Dox (+) *DUX4*  
193 TetOn hESCs and ~ 90% of these enhancers have not been identified previously<sup>16-18</sup>  
194 (Fig. 3b, Supplementary Information 3). Hereafter, novel enhancers that are exclusive  
195 to Dox (+) *DUX4* TetOn hESCs are called “novel *DUX4* enhancers”. Notable, 36.7%  
196 of the novel *DUX4* enhancers overlapped with ERVL-MaLR elements (Fig. 3b). We  
197 next annotated enhancer expression in our data and identified putative enhancers for  
198 three upregulated minor genome activation genes; *LEUTX* (Fig. 3c, d), previously  
199 unannotated *RETT FINGER PROTEIN* (Fig. 3c, Extended Data Fig. 4), and either for  
200 *KHDC1* or *KHDC1L* (Fig. 3c, Extended Data Fig. 4). Further, promoters of 12 minor  
201 embryo genome activation genes were significantly upregulated by *DUX4* induction  
202 (Fig. 3c, Supplementary Information 4). We identified the exact promoter position for  
203 the *ZSCAN4* that is upregulated by *DUX4* expression (Extended Data Fig. 5d). We  
204 designed guide RNAs for the *LEUTX* promoter and putative novel enhancer regions  
205 (Extended Data Fig. 5e) to experimentally test these using the CRISPRa activation  
206 system<sup>19</sup> in HEK293 cells. The expression level of *LEUTX* nearly doubled when the  
207 guide RNAs targeting the promoter region were transfected together with the putative  
208 enhancer 1 targeting guide RNAs in comparison to the promoter targeting guide RNAs  
209 only (Fig. 3e). Out of the 56 retroelement families ERVL-MaLRs significantly  
210 overlapped with the novel *DUX4* enhancers (Fig. 3f and Extended Data Fig. 5f),  
211 constituting ~37% of all novel *DUX4* enhancers ( $P < 2.2 \times 10^{-16}$ ; Fig. 3b). Out of novel

212 DUX4 enhancers 28% overlapped with DUX4 binding sites ( $P < 2.2e-16$ ). Using DUX4  
213 ChIP-seq data we compared whether ERVL-MaLRs regions were more often  
214 associated with gene promoter or enhancer regions. Only 9.5% of the DUX4 binding  
215 site overlapping ERVL-MaLRs were associated with promoter regions while ~37%  
216 were associated with enhancer regions (Fig. 3g). In summary, *DUX4* induces a large  
217 number of novel enhancers, many of which overlap with ERVL-MaLR regions and  
218 regulate the genome at the time of oocyte-to-embryo transition.

219

#### 220 *DUX4 protein domains mediating the DUX4 interactions*

221 Given predominant DUX4 protein presence in the embryos and stage-specific nuclear  
222 localization, we set out to study how *DUX4* could mediate such a powerful induction  
223 of the genome. For this, we analysed the structural features and protein-protein  
224 interactions of DUX4. DUX4 comprises two homeodomains and an intrinsically  
225 disordered region with three regions of predicted low disorder conserved in primates.  
226 Two predicted amphipathic helices contain a nine amino acid transactivation domain  
227 (9aaTAD<sup>20</sup>), also present in LEUTX<sup>21</sup>, and a motif known to recruit the KIX domain<sup>22</sup>  
228 of the cAMP-response element binding protein (CREB)-binding protein (CBP)<sup>23</sup> (Fig.  
229 4a). We modelled the 9aaTAD peptide 371GLLLDELLA379 and the 416EYRALL421  
230 peptide (KBM, KIX binding motif) into the MLL and pKID/c-Myb site of the ternary  
231 complex NMR structure of human KIX from CBP<sup>24</sup> (PDB: 2LXT) (Fig. 4b,  
232 Supplementary Information 6). The hydrophobic residues of 9aaTAD and KBM  
233 complement well what is seen in the KIX:MLL:pKID complex. Indeed, experimental  
234 tight binding (Extended Data Fig. 6 a-c) was detected for peptides overlapping the  
235 9aaTAD ( $K_d \approx 0.2 \mu\text{M}$ ) and KBM ( $K_d \approx 0.6 \mu\text{M}$ ) sequences of DUX4 to KIX domain,



236 and for KBM binding in the presence of 9aaTAD ( $K_d \approx 1.1 \mu\text{M}$ ). Because DUX4 is  
237 observed in the cytoplasm (Fig. 1c), we asked whether the homeodomain1-linker-  
238 homeodomain2 structure would be stable as a unit without bound DNA and subjected  
239 the crystal structure of DUX4 (PDB: 6E8C<sup>25</sup>, Supplementary Information 7) to  
240 molecular dynamics simulations. Ten residues, highly conserved in primates, form two  
241 interacting clusters (Extended Data Fig. 6 d, e), stabilizing both domains even in the  
242 absence of DNA (Supplementary movie 8). While the predominantly charge-charge  
243 interactions hold the two homeodomains together (Extended data Fig. 6 f-i), the  
244 intermediate linker loop imparts flexibility, which could be vital to accommodate DNA  
245 once DUX4 enters the nucleus and locates its binding motif. Indeed, the double  
246 homeodomain without DNA opened dramatically, by over 38 Å, and the stable open  
247 conformation would be suited to initial interactions with DNA and be consistent with  
248 the proposed two-step clamp-like binding mechanism<sup>26</sup>.

249

250 To identify protein-protein interactions of DUX4 we used the MAC-tag method where  
251 stable (AP-MS) and transient (BioID) interactions can be reliably identified<sup>27,28</sup>. We  
252 identified 43 AP-MS and 158 BioID high-confidence DUX4 interactions, out of which  
253 19 appeared in both datasets (FDR < 0.05, corresponding to > 0.73 SAINT Score)  
254 (Supplementary Information 9). Overrepresentation Enrichment Analysis (ORA) of  
255 protein pathway markers (Reactome, KEGG) showed significant enrichment ( $P < 0.05$ ,  
256 FDR < 0.01) of markers linked to ‘transcription’, ‘RNA polymerase II Transcription’,  
257 ‘chromatin organization’ and ‘chromatin modifying enzymes’. Comparison of our list  
258 of genes to the protein complex databases ComplexPortal and Corum using Fisher’s  
259 Exact Test yielded significant overrepresentation of the SWI/SNF chromatin  
260 remodelling complex, NSL and NuA4 histone acetyltransferase complex, SRCAP

261 histone exchanging complex, and the Core Mediator complex, ( $P < 0.05$ , FDR  $< 0.01$ )  
262 (Fig. 4c). Several DUX4 interacting proteins were classified as RNA binding  
263 (GO:0003723), spliceosome and pre-mRNA-splicing (Fig. 4c and SI 10). As the protein  
264 interaction assay was performed in the HEK 293 cell line, we studied which of the  
265 identified DUX4 interacting proteins are expressed by human oocytes or embryos<sup>8,29</sup>.  
266 Nearly all genes coding for the DUX4 interacting proteins were expressed in oocytes,  
267 embryos, or both. These results suggested that DUX4 may regulate maternal and  
268 embryonic proteins in the cytoplasm and nucleus during the oocyte-to-embryo  
269 transition and minor embryonic genome activation.

270

271

272 **Discussion**

273 The oocyte-to-embryo transition gradually sets the stage for embryo development<sup>30-33</sup>.  
274 DUX4 is an obvious primary candidate mediating chromatin and transcriptome changes  
275 that are crucial for oocyte-to-embryo transition. Knock-down of *DUX4* in the human  
276 zygotes did not cause mitotic arrest during the 2-day experiment, in agreement with  
277 recent findings on *Dux* in mouse embryos where a few of the embryos may proceed  
278 until the blastocyst stage<sup>3,34,35</sup>. In the mouse *Dux*<sup>-/-</sup> embryos, around one third of the  
279 embryo genome activation transcripts that are normally upregulated were instead  
280 downregulated<sup>35</sup>, while in our human *DUX4* knock-down embryos, many of the  
281 maternal, normally downregulated genes remained unchanged. This shows that the role  
282 of *DUX4* in the human is not limited to embryo genome activation but that *DUX4* alone  
283 is not sufficient for either the oocyte-to-embryo transition or the embryonic genome  
284 activation. Given that DUX4 seems to contribute to the maternally biased expressed  
285 genes<sup>36</sup>, knockdown at the human zygote stage may hamper observing the entire  
286 spectrum of DUX4 functions in the human oocyte-to-embryo transition.

287

288 Transient upregulation of *DUX4* mRNA in zygotes and the increasing nuclear DUX4  
289 protein intensity from zygotes until 4-cell stage embryos and its clearance from the  
290 nuclei of 8-cell embryos suggested that DUX4 is not only an inducer of the minor  
291 embryo genome activation transcripts but that it could also modulate the genome more  
292 pervasively and already before genome activation takes place. Ectopic expression of  
293 *DUX4* in the hESCs caused extensive chromatin opening, largely at newly identified  
294 enhancers and ERVL-MaLR elements. Thirty-seven percent of the novel DUX4  
295 enhancers were suggested to be derived from ERVL-MaLR elements, indicating that  
296 some of the ERVL-MaLRs may function as cells stage specific enhancers in human

297 embryos. Indeed, retroelement regions have been suggested to function as regulatory  
298 elements, providing novel promoters and possibly enhancers to increase transcriptional  
299 complexity especially during development<sup>37,38</sup>. Accordingly, long terminal repeat  
300 elements have been suggested as key elements contributing to the oocyte-to-embryo  
301 transition<sup>39</sup>. DUX4 upregulation around the time of fertilization may contribute to  
302 switching from the maternal<sup>40</sup> to the cleavage embryo specific retroelements. It is  
303 intriguing to speculate, whether activation of ERVL-MaLR elements together with the  
304 DUX4 enhancerome provides a correct ‘genomic niche’ for the subsequent genome  
305 activation step. It was recently shown that in mouse Dux binding at *Mervl* loci drives  
306 chromatin reorganisation at these loci in 2-cell embryo-like cell lines, and that  
307 chromatin organisation during early mouse development is a consequence of the *Mervl*  
308 integration<sup>41</sup>. To date, human 2-cell-like cell lines have not been established, but  
309 importantly, in our experiments, activation of the DUX4 and its likely binding at  
310 ERVL-MaLR elements<sup>6</sup> could modify chromatin towards human cleavage embryo-like  
311 stage in the hESCs.

312

313 According to our DUX4 proteome data some of the strongest DUX4 interactors were  
314 the Mediator complex proteins, many of them identified in both stable and transient  
315 interactions. Mediator complex proteins interact with both chromatin modifiers and  
316 sequence-specific transcription factors<sup>42</sup> and they have been shown to connect  
317 enhancers to promoters<sup>43-45</sup>. The 9 amino acid transactivator domain present in DUX4  
318 is known to interact specifically with MED15 transcriptional mediator<sup>22</sup>, also present  
319 in our proteome interaction data. Our modelling of the DUX4 protein structure  
320 suggested that DUX4 C-terminus contains two transcriptional transactivator domains,  
321 the 9aaTAD and the KIX-binding domain. According to our protein model, the KIX

322 binding motif of the DUX4 appears highly functional, alluding to DUX4 having all the  
323 attributes for rapid target binding and activation, as an ideal candidate for rapid  
324 modification of a number of genomic regions, including the newly identified enhancers.  
325 Therefore, our data suggests that by using its C-terminal domains, DUX4 binds  
326 Mediator complex proteins and chromatin modifiers, like p300<sup>23</sup>, and modulates the  
327 transcriptome, including enhancers, during oocyte-to-embryo transition. In conclusion,  
328 DUX4 is a pioneering factor participating in setting the stage for human embryo  
329 development.

330

331

332 **Online methods**

333

334 *Human pre-implantation embryos for single cell RNA-sequencing using single-Cell*

335 *Tagged Reverse Transcription (STRT)*

336 We analysed single cell RNA-sequencing data from Töhönen et al.<sup>8</sup> for MII oocytes

337 (n=20), zygotes (n=59), 2-cell (n=4), 4-cell (n=15) and 8-cell (n=14) embryos.

338 For the DUX4 knockdown experiment, siCTRL cells (n=18 cells, from two embryos)

339 and siDUX4 cells (n=18 cells, from three embryos) were analysed. The embryos were

340 incubated in Ca<sup>2+</sup>/Mg<sup>2+</sup>-free culture medium (Biopsy Medium, Origio) at 37°C on a

341 heated stage for separation of the cells. Individual cells were briefly rinsed in

342 Ca<sup>2+</sup>/Mg<sup>2+</sup>-free PBS and placed directly in lysis buffer (5mM Tris-HCl, pH 7.0

343 (LifeTechnologies), 5mM DTT (Thermo Scientific), 0.02% Triton X-100 (Fisher

344 Scientific), 0.5 U/μl Ribolock RNase inhibitor (Thermo Fisher)). The library was

345 prepared according to the published protocol<sup>8,46,47</sup>. The amplified libraries were

346 sequenced on the Illumina HiSeq2000 instrument.

347

348 *Bulk RNA-sequencing of FACS sorted cells using STRT method*

349 TetOn-DUX4 hESCs either with or without doxycycline treatment (see above) were

350 incubated with TrypLE for 5 min, detached, and suspended into cold FACS buffer (5%

351 FBS in PBS). The cell suspension was filtered through Cell strainers to remove any

352 cell clumps and centrifuged at 107g pm for 5 min. The cell pellets from Dox (+) and

353 Dox (-) cultures were suspended in the cold FACS buffer and placed on ice. EmGFP (-

354 ) cells from the Dox (-) and EmGFP (+) cells from the Dox (+) suspension were sorted

355 into cold FACS buffer using a Sony SH800Z Cell Sorter with blue laser (488) and 100

356  $\mu\text{m}$  nozzle. Total RNA was isolated from FAC-sorted DUX4-TetOn hES cells using  
357 the RNAqueous Total RNA Isolation Kit (AM1912; Thermo Fisher Scientific). 20 ng  
358 of total RNA from each sample was used for library preparations. The libraries were  
359 prepared using the STRT method as above, with minor modifications. Briefly, RNA  
360 samples were placed in a 48-well plate in which a universal primer, template-switching  
361 oligos, and a well-specific 8 bp barcode sequence (for sample identification) were  
362 added to each well<sup>48,49</sup>. The synthesized cDNAs from the samples were then pooled  
363 into one library and amplified by single-primer PCR with the universal primer  
364 sequence. The resulting amplified library was then sequenced using the Illumina  
365 NextSeq500 instrument.

366

#### 367 *Pre-processing of raw STRT RNAseq reads*

368 The sequenced STRT raw reads were processed using STRTprep<sup>48</sup> (v3dev branch  
369 commit 91a62d2 available at <https://github.com/shka/STRTprep/tree/v3dev>). The  
370 processed nonredundant reads were aligned to the hg19 human reference genome  
371 sequences. External RNA Control Consortium (ERCC) spike-in sequences and the  
372 human ribosomal DNA unit (GenBank: U13369) with RefSeq transcript alignments as  
373 a guide of exon junctions. For gene-based statistics, uniquely mapped reads within (i)  
374 the 5'-UTR or the proximal upstream (up to 500 bp) of the RefSeq protein coding genes,  
375 and (ii) within the first 50 bp of spike-in sequences, were counted. For TFE-based  
376 statistics, the mapped reads were assembled according to the alignments, and uniquely  
377 mapped reads within the first exons of the assembled transcripts were counted, as  
378 described in Töhönen et al. 2015<sup>8</sup>.

379

380 *Downstream STRT RNA-sequencing data analysis*

381 Differentially expressed genes and TFEs between two groups had i) significantly  
382 different distributions between the two groups by Wilcoxon statistics with multiple  
383 resampling<sup>49,50</sup> (q-value < 0.05), and ii) significantly larger variation than technical  
384 variation, which was estimated by variation of the sequenced spike-in RNA levels<sup>51,48</sup>,  
385 among all samples of the two groups ( $P$ -value < 0.05 adjusted by Benjamini-Hochberg  
386 correction). The differential expression was tested by STRTprep pipeline<sup>48</sup>. Enrichment  
387 analysis of anatomical terms for the list of upregulated genes by siDUX4 was  
388 performed using the TopAnat<sup>49</sup>. All human genes in the Bgee database  
389 ([https://bgee.org/?page=top\\_anat](https://bgee.org/?page=top_anat))<sup>11</sup> were used as background. STRT data of the early  
390 human embryo were obtained from Töhönen et al. 2015 and 2017<sup>7,8</sup> and were  
391 overlapped with TFEs using the intersectBed function from BEDTools<sup>52</sup> (v2.27.1).  
392 DUX4 ChIP-seq data was obtained from GSE33838<sup>5</sup> and scores around the FEs were  
393 calculated with computeMatrix and visualized with plotProfile from deepTools<sup>53</sup>  
394 (v3.1.3). Motif enrichment was analyzed using the command findMotifsGenome.pl  
395 from HOMER<sup>54</sup> (v4.10.3) with the option “-size -300,100”. Enrichment analysis with  
396 publicly available ChIP-seq datasets was conducted with ChIP-Atlas<sup>55</sup> ([http://chip-](http://chip-atlas.org)  
397 [atlas.org](http://chip-atlas.org)). A total of 7,216 human transcription factor ChIP-seq datasets which had  
398 more than 500 peaks were analyzed. Fold enrichment was calculated as (the number of  
399 ChIP-seq peaks overlapping with upregulated TFEs / the number of upregulated TFEs)  
400 / (the number of ChIP-seq peaks overlapping with all TFEs / the number of all TFEs).  
401  $P$ -values were calculated with Fisher’s exact test and  $Q$ -values were calculated with the  
402 Benjamini & Hochberg method. After excluding the TFEs annotated on ribosomal  
403 DNA, 6,425 upregulated TFEs were used as foreground and 109,624 all the detected  
404 TFEs were used as background both in the motif and ChIP-seq enrichment analysis.



405

406 *Library preparation, sequencing and read-alignment for CAGE-based data*

407 Nascent RNA from flash-frozen cells was isolated as described by Hirabayashi et al.<sup>16</sup>  
408 with the following exceptions: (i) 5× DNase I enzyme (Thermo Fisher Scientific) was  
409 used to prepare the DNase I solution (50 µl), (ii) the samples were incubated for up to  
410 1 h at 37°C while being pipetted up and down several times every 10 min, and (iii)  
411 RNA quality was measured using TapeStation 4200 (Agilent). CAGE-based libraries  
412 were generated according to the no-amplification non-tagging CAGE libraries for  
413 Illumina next-generation sequencers (nAnT-iCAGE) protocol<sup>56</sup>. All CAGE-based  
414 libraries were sequenced in single-read mode on an Illumina NextSeq500 platform.  
415 Reads were split by barcode using the MOIRAI<sup>57</sup> package. Cutadapt v 1.1.8  
416 (<http://code.google.com/p/cutadapt/>) was used to trim reads to 73 bp, and remove reads  
417 below base quality 33 and ‘N’ bases. Reads aligning to ribosomal RNA sequences  
418 (GenBank U13369.1) were removed using the rRNA dust script within the MOIRAI  
419 package. The resulting reads were aligned to the human genome (hg19) using STAR v  
420 2.5.0a<sup>58</sup> with Gencode v27lift37 (“comprehensive”)<sup>59</sup> as the reference gene model.  
421 Mapping was performed with the following parameters: --runThreadN 12 --  
422 outSAMtype BAM SortedByCoordinate --out FilterMultimapNmax 1. Following  
423 alignment, the technical replicates were merged using the Picard Toolkit v 2.0.1 with  
424 the MergeSamFiles program (Broad Institute, Picard Toolkit, 2018.  
425 <http://broadinstitute.github.io/picard>).

426

427 *Identification of transcribed promoters and enhancers*

428 Reads mapping to known FANTOM5 promoters<sup>60</sup> and FANTOM-NET enhancers<sup>16</sup>  
429 were counted and normalized essentially as described in<sup>16</sup>. Decomposition peak  
430 identification ([https://github.com/hkawaji/dpi1/blob/master/identify\\_tss\\_peaks.sh](https://github.com/hkawaji/dpi1/blob/master/identify_tss_peaks.sh))  
431 was used to identify tag clusters with default parameters but without decomposition.  
432 Peaks with at least three supporting CAGE tags were retained and used as input to  
433 identify bidirectional enhancers  
434 ([https://github.com/anderssonrobin/enhancers/blob/master/scripts/bidir\\_enhancers](https://github.com/anderssonrobin/enhancers/blob/master/scripts/bidir_enhancers)).  
435 Differential expression (DE) analysis with Benjamini–Hochberg false discovery rate  
436 (FDR) correction was performed for promoters and enhancers using egdeR v3.26.8<sup>61,62</sup>.  
437 Lowly expressed promoters and enhancers (average value between replicates  $< -2.5$   
438  $\log_2$  CPM) were excluded from the analysis. Promoters and enhancers with  $FDR \leq 0.01$   
439 were identified as differentially expressed.

440

441 *LEUTX enhancer validation*

442 Putative LEUTX enhancer regions 1 and 2 were predicted from TetOn DUX4 hESC  
443 NET-CAGE dataset. The guide RNAs targeting the LEUTX promoter and each of the  
444 putative enhancers were designed using the Benchling CRISPR tool  
445 (<https://benchling.com>), targeting them to the proximal promoter ( $-400$  to  $-50$  base  
446 pairs from transcription start site) or the putative enhancers. Possible guide sequences  
447 were selected according to their off-target score and position. Guide RNA oligos are  
448 shown in Extended Data table 7. Guide RNA transcriptional units (gRNA-PCR) were  
449 prepared by PCR amplification and transfected to HEK293 cells as described in Balboa  
450 et al. 2015<sup>63</sup>.

451

452 *Guide RNA production*

453 Guide RNA transcriptional units (gRNA-PCR) were prepared by PCR amplification  
454 with Phusion polymerase (Thermo Fisher), using as template U6 promoter and  
455 terminator PCR products amplified from pX335 together with a guide RNA sequence-  
456 containing oligo to bridge the gap. PCR reaction contained 50 pmol forward (Fw) and  
457 reverse (Rev) primers, 2 pmol guide oligo, 5 ng U6 promoter and 5 ng terminator PCR  
458 products in a total reaction volume of 100 $\mu$ l. PCR reaction program was 98C/10sec,  
459 56C/30sec, 72C/12sec for 35 cycles. Amplified gRNA-PCRs were purified. When  
460 needed, alternative Fw and Rev primers were used to incorporate suitable restriction  
461 sites for gRNAPCR concatenation. LEUTX promoter gRNA-PCR units were  
462 concatenated using Golden Gate assembly<sup>64</sup>. Destination vector GGdest-ready was  
463 generated by PCR-cloning Esp3I destination cassette from pCAG-T7-TALEN  
464 (Sangamo)-Destination (Addgene: 37184<sup>65</sup> into pGEM-4Z (Promega). Assembly  
465 reactions contained 150 ng of GGdest-ready vector, 50 ng of each gRNA-PCR product  
466 (five in total), 1 uL Esp3I (Thermo Fisher, ER0451), 2 uL T4 DNA ligase (Thermo  
467 Fisher, EL0011), 2 uL T4 ligase buffer and 2 uL DTT (10mM, Promega, V3151) in a  
468 final volume of 20 uL. Thermal cycle consisted of 50 cycles of restriction/ligation (2  
469 min at 37°C, 5 min at 16°C) followed by enzyme inactivation step (20 min at 80°C).  
470 Ten microliters of the reaction were transformed into DH5alpha chemical competent  
471 bacteria and plated on LB agar containing ampicillin. Correct concatenation of the  
472 gRNA-PCR products was confirmed by sequencing.

473

474 *HEK cell transfection*

475 HEK 293 cells were seeded on tissue culture treated 24 well plates one day prior to  
476 transfection ( $10^5$  cells/well). Cells were transfected using FuGENE HD transfection  
477 reagent (Promega) in fibroblast culture medium with 500 ng of dCas9VP192  
478 transactivator encoding plasmid and 200 ng of gRNA-PCR or gRNA-PCR and vector  
479 containing LEUTX promoter targeting guides. Cells were cultured for 72 hours post-  
480 transfection, after which samples were collected for qRT-PCR.

481

#### 482 *Human ESC culture*

483 hESC lines H1 (WA01) and H9 (WA09) were purchased from WiCell. The hESCs were  
484 maintained on Geltrex-coated tissue culture dishes in Essential 8 culture medium and  
485 passaged every three to five days by incubation with 0.5 mM EDTA (all from Thermo  
486 Fisher Scientific).

487

#### 488 *Plasmid construction*

489 The full-length DUX4 (NM\_001293798.2) was synthesized and cloned between the  
490 Sall and BamHI sites of the pB-tight-hMAFA-ires-EmGFP-pA-PGK-Puro vector (a  
491 kind gift from Diego Balboa, Biomedicum Stem Cell Centre) at GenScript (Genscript,  
492 NJ, USA).

493

#### 494 *Generation of TetOn DUX4 human embryonic stem cells*

495 hESCs were incubated with StemPro Accutase (Thermo Fisher Scientific) until the  
496 edges of the colonies started to curl up. The Accutase was aspirated and the cells were

497 gently detached in cold 5% FBS (Thermo Fisher Scientific) 1×PBS (Corning) and  
498 counted. One million cells were centrifuged at 107g for 5 min and the pellet was  
499 transferred into 120 µl of R-buffer containing 1 µg of pB-tight-DUX4-ires-EmGFP-  
500 pA-PGK-Puro, 0.5 µg of pBASE and 0.5 µg of rtTA-M2-IN plasmids. 100 µl of the  
501 cell-plasmid suspension was electroporated with two pulses of 1100V, 20 ms pulse  
502 width, using Neon Transfection system (Thermo Fischer Scientific). The electroporated  
503 cells were plated on Geltrex-coated dishes in Essential 8 medium with 10 µM ROCK  
504 inhibitor Y27632 (Selleckhem). The following day, the medium was exchanged with  
505 fresh Essential 8 medium without ROCK inhibitor. The cells were selected with  
506 Puromycin at 0.3 µg/ml. The TetOn-DUX4 hESC clones were picked manually on  
507 Geltrex-coated 96-well plates, expanded and selected again with Puromycin.  
508 Appearance of the EmGFP reporter protein was tested using Doxycycline at  
509 concentrations ranging from 0.2 µg/ml to 1.0 µg/ml and detected using an EVOS FL  
510 Cell imaging system (Thermo Fisher Scientific). For the experiments presented in this  
511 paper, the DUX4 TetOn hESCs have been treated with 1µg/ml of doxycycline for 1, 2,  
512 or 3 h (qPCR) or 4 h (STRT-RNA seq, ATAC-seq, NET-CAGE) prior to subsequent  
513 analyses.

514

#### 515 *cDNA cloning of previously unannotated genes*

516 A cDNA library was prepared from a single human 4-cell embryo according to the  
517 protocol by Tang et al.<sup>66</sup> and used for cloning of putative transcripts. Transcripts were  
518 amplified using Phusion High-Fidelity DNA polymerase (New England Biolabs)  
519 according to manufacturer's instructions. Predicted KHDC1 pseudo gene 1, putative  
520 RING-finger type E3 ubiquitin ligase, and putative RING-finger domain protein  
521 encoding genes were amplified using touchdown PCR: 98°C for 30 s; 24 cycles of 98°C

522 for 10 s, annealing for 30 s, temperature decreasing from 63°C to 56°C, 1°C/3 cycles,  
523 72°C for 30 s; 16 cycles of 98°C for 10 s, 55°C for 30 s, 72°C for 30 s; final extension  
524 72°C for 10 min. All PCR products were cloned into pCR4Blunt-TOPO vector using  
525 the Zero Blunt TOPO PCR Cloning kit (Invitrogen) and sequences were verified by  
526 Sanger sequencing (Eurofins Genomics). Clone sequences are available from the ENA  
527 browser at <http://www.ebi.ac.uk/ena/data/view/LR694082-LR694089>.

528

### 529 *Bioinformatics analysis and molecular dynamics simulations of the DUX4 protein*

530 The sequences of the human DUX family proteins were obtained from the UniProt  
531 database (The UniProt Consortium), whereas DUX4 sequences from other primates  
532 were retrieved from the non-redundant database of NCBI using blastp<sup>67</sup> with human  
533 DUX4 (UniProt ID: Q9UBX2) as the query sequence (SI 5). Multiple sequence  
534 alignment over the full-length sequences was carried out using MAFFT<sup>68</sup> with default  
535 parameters. Secondary structures, solvent accessibility and disordered regions were  
536 predicted using SCRATCH<sup>69</sup> and RaptorX-Property<sup>70</sup>. The 9aaTAD web server (“Most  
537 Stringent Pattern”<sup>71</sup>) was used to predict 9aaTAD motifs. The crystal structure of the  
538 DUX4 HD1-linker-HD2 fragment bound to DNA (PDB: 6E8C<sup>25</sup>) was obtained from  
539 the Protein Data Bank (PDB; <sup>72</sup>). PyMOL (version 2.4; Schrödinger LLC) and Bodil<sup>73</sup>  
540 were used to analyze inter-HD interactions. For modeling the binding of the 9aaTAD  
541 peptide<sup>371</sup>GLLLDELLA<sup>379</sup> and the KBM <sup>416</sup>EYRALL<sup>421</sup> peptide of DUX4 onto the  
542 KIX domain, the NMR structure (model 1/20) of human KIX in complex with MLL  
543 and pKID peptide<sup>24</sup> (PDB: 2LXT) was chosen as the template; the sequence  
544 <sup>846</sup>PSDIMDFVL<sup>854</sup> of MLL and <sup>13</sup>SYRKIL<sup>138</sup> of pKID were mutated in PyMOL to  
545 match the DUX4 sequences <sup>371</sup>GLLLDELLA<sup>379</sup> and <sup>416</sup>EYRALL<sup>421</sup>, respectively, and

546 the coordinates of extra residues of the MLL and pKID peptides were removed; PDB  
547 coordinates for KIX in complex with DUX4 9aaTAD and KBM peptides in  
548 Supplementary Information 6.

549

550

551 *Expression of human KIX domain from CBP, binding of C-terminal peptides*

552

553 A synthetic, codon-optimized gene in pET100/TOPO vector (Invitrogen GeneArt Gene  
554 Synthesis, Thermo Scientific) was used to express the human KIX domain of CBP  
555 (residues 587-673; Uniprot Q92793) in *E. coli* BL21 DE3 cells. The expressed  
556 construct (14.5 kDa) contained 36 extra N-terminal residues, including a 6xHis tag, the  
557 Xpress™ epitope and an enterokinase cleavage site, in addition to the KIX domain  
558 (86 residues). Transformed *E. coli* were grown with ampicillin selection in 600 ml of  
559 ZYM-5025 autoinduction medium<sup>74</sup> for 10 h at 37°C. The cells were collected by  
560 centrifugation at 3,000×g for 20 min and stored at -20°C. The pellets were thawed and  
561 suspended in buffer A (50 mM Tris, pH 8.0, 500 mM NaCl) with 20 mM imidazole and  
562 lysed by sonication. The supernatant was separated from the cell debris by  
563 centrifugation (45,000×g for 40 min) and applied to a three-step purification protocol  
564 using an ÄKTA Pure 25 chromatography system (GE) with a UV detector. First, a  
565 Histrap HP (1 ml; GE) column was used for metal-affinity chromatography: the sample  
566 was applied and the column was subsequently washed with 25 column volumes (CV)  
567 of buffer A with 20 mM imidazole. KIX was eluted with a linear imidazole gradient  
568 from 20 mM to 500 mM in buffer A over 15 CV, and the column was then washed with  
569 5 CV of 500 mM imidazole in buffer A. The KIX containing fractions (ca. 7 ml) were  
570 identified by UV absorbance at 280 nm, pooled, then dialyzed (30× volume, two

571 exchanges, CelluSep dialysis membrane, MWCO 6-8K; Membrane Filtration Products,  
572 Inc.) against buffer B (25 mM CHES, pH 9.0). Second, anion exchange  
573 chromatography was performed with a Resource Q column (1 ml; GE). The cleared  
574 (3,200×g for 15 min) dialysis pool was applied to the column, the column was washed  
575 with 20 CV of buffer B, and eluted with a linear gradient from 0 to 1 M NaCl in buffer  
576 B over 15 CV. The KIX containing fractions were pooled (ca. 4 ml), then concentrated  
577 with an Amicon Ultra-4 centrifugal filter (MWCO 3K; Merck Millipore) to a volume  
578 of 0.5 ml. Third, the concentrated sample was applied to a Superdex 75 10/300 GL size  
579 exclusion chromatography column (GE) and eluted with buffer C (25 mM Tris, pH 8.4,  
580 150 mM NaCl) using a flow rate of 0.5 ml/min (0.5 ml fractions). The purity of the  
581 sample was analyzed with SDS-PAGE and Coomassie staining, and the concentration  
582 was verified by measuring the UV absorbance at 280 nm with NanoDrop One (Thermo  
583 Scientific).

584

585 Binding assays were performed using a Monolith NT(TM) microscale thermophoresis  
586 instrument (Nanotemper Technologies). The His-tagged KIX domain was labeled non-  
587 covalently using Monolith NT(TM) His-Tag Labeling Kit RED-tris-NTA (1st  
588 generation; Nanotemper Technologies) according to manufacturer's instructions.  
589 Monolith NT.Automated Capillary Chips (Nanotemper Technologies) were used to test  
590 binding and to determine the affinity of the 9aaTAD (<sup>371</sup>GLLLDELLA<sup>379</sup>) and KBM  
591 (<sup>416</sup>EYRALL<sup>421</sup>) peptides to KIX; the homedomain of human LEUTX with His-Tag  
592 was used as a negative control. Peptides were ordered from GenScript and dissolved in  
593 deionized water. The final concentration of KIX in the assay was 20 nM, and the  
594 concentration of each peptide in a binding test assay was 5 μM (250× molar excess).



595 The KIX protein and the peptide samples were diluted in PBS-Tween (pH 7.4 0.05%  
596 v/v of Tween 20) buffer for the assays.

597

598 *Molecular dynamics simulations*

599

600 Based on the DUX4 structure (PDB: 6E8C,<sup>25</sup>), molecular dynamics (MD) simulations,  
601 over all atoms, were used to explore the dynamic states of DUX4: (1) double HD  
602 complex with (HD1-HD2 + DNA) and (2) without (HD1-HD2) bound DNA, and (3)  
603 HD1 + DNA and (4) HD2 + DNA. Prior to the simulations, hydrogen atoms and  
604 missing side-chain atoms for R22 of DUX4 were added using Chimera<sup>75</sup>. MD  
605 simulations with the AMBER package (version 18; Case, D.A., 2018. The Amber  
606 Project, <https://ambermd.org/CiteAmber.php>) used the ff14SB (for protein;<sup>76</sup>) and  
607 OL15 (for DNA<sup>77</sup>) force fields. The structures were solvated with explicit TIP3P water  
608 molecules<sup>78</sup> within an octahedral box ensuring a 12 Å distance between the boundaries  
609 of the simulation box and solute atoms. Sodium counter ions were added to neutralize  
610 the system and additional Na<sup>+</sup>/Cl<sup>-</sup> ions were added to bring the salt concentration to 150  
611 mM. Periodic boundary conditions were implemented, and the particle-mesh Ewald  
612 algorithm was applied<sup>79</sup> for electrostatic interactions with a distance cutoff of 9 Å. For  
613 full details of the simulation protocol see Tamirat et al., 2019<sup>80</sup>. Conformations were  
614 saved every 10 ps and the resulting MD trajectories were analysed further by  
615 calculating the root-mean-square deviations (RMSD; over backbone atoms) and root-  
616 mean-square fluctuations (RMSF; over C $\alpha$  atoms), as well as monitoring hydrogen  
617 bond interactions using CPPTRAJ<sup>81</sup> and VMD<sup>82</sup>. Coordinates (PDB format) of DUX4  
618 HD1-HD2 *sans* DNA after 100 ns simulation in Supplementary Information 7.

619

620 *Cloning of DUX4 to MAC-tag Gateway® destination vector*

621 DUX4 was first amplified in a two-step PCR reaction from pB-tight-DUX4-ires-  
622 EmGFP-pA-PGK-Puro and cloned into a Gateway compatible entry clone using  
623 Gateway BP Clonase II (Invitrogen) according to manufacturer's instructions. The  
624 entry clone was further cloned to Gateway compatible destination vectors containing  
625 the C-terminal and N-terminal tags as described<sup>28</sup>. Transfection and selection of the  
626 Flp-In™ T-REx™ 293 cells (Invitrogen, Life Technologies, R78007, cultured in  
627 manufacturer's recommended conditions) and affinity purification of the final product  
628 was done as previously<sup>28</sup>.

629

630 *Liquid Chromatography-Mass Spectrometry*

631 Analysis was performed on a Q-Exactive mass spectrometer with an EASY-nLC 1000  
632 system via an electrospray ionization sprayer (Thermo Fisher Scientific), using  
633 Xcalibur version 3.0.63. Peptides were eluted from the sample with a C18 precolumn  
634 (Acclaim PepMap 100, 75 µm × 2 cm, 3 µm, 100 Å; Thermo Scientific) and analytical  
635 column (Acclaim PepMap RSLC, 65 µm × 15 cm, 2 µm, 100 Å; Thermo Scientific),  
636 using a 60 minute buffer gradient ranging from 5% to 35% Buffer B, then a 5 min  
637 gradient from 35% to 80% Buffer B and 10 minute gradient from 80% to 100% Buffer  
638 B (0.1% formic acid in 98% acetonitrile and 2% HPLC grade water). 4 µl of peptide  
639 sample was loaded by a cooled autosampler. Data-dependent FTMS acquisition was in  
640 positive ion mode for 80 min. A full scan (200–2000 m/z) was performed with a  
641 resolution of 70,000 followed by top10 CID-MS<sup>2</sup> ion trap scans with a resolution of  
642 17,500. Dynamic exclusion was set for 30 s. Database search was performed with  
643 Proteome Discoverer 1.4 (Thermo Scientific) using the SEQUEST search engine on the

644 Reviewed human proteome in UniProtKB/SwissProt databases  
645 (<http://www.uniprot.org>, downloaded Nov. 2018). Trypsin was selected as the cleavage  
646 enzyme and maximum of 2 missed cleavages were permitted, precursor mass tolerance  
647 at  $\pm 15$  ppm and fragment mass tolerance at 0.05 Da. Carbamidomethylation of cysteine  
648 was defined as a static modification. Oxidation of methionine and biotinylation of  
649 lysine and N-termini were set as variable modifications. All reported data were based  
650 on high-confidence peptides assigned in Proteome Discoverer (FDR < 0.05).

651

### 652 *Identification of statistical confidence of interactions*

653 Significance Analysis of INTERactome (SAINT<sup>83</sup>)-express version 3.6.3 and  
654 Contaminant Repository for Affinity Purification (CRAPome,  
655 <http://www.crapome.org>) were used to discover statistically significant interactions  
656 from the AP-MS data<sup>84</sup>. The DUX4 LC-MS data was ran alongside a large dataset of  
657 other transcription factors, as well as a large GFP control set. Final results represent  
658 proteins with a SAINT score higher than 0.73, and present in all four replicates.

659

### 660 *Overrepresentation Analysis*

661 Overrepresentation analysis of statistically significant interactions in Gene Ontology  
662 and Reactome was done in WebGestalt<sup>85</sup>, and overrepresentation of prey proteins in  
663 ComplexPortal<sup>86</sup> (<https://www.ebi.ac.uk/complexportal>) and CORUM<sup>87</sup>  
664 (<https://mips.helmholtz-muenchen.de/corum/>) was done using Fisher's exact test and  
665 multiple testing correction in an in-house R-script.

666

667 *Interaction network*

668 Protein interaction networks were constructed from filtered SAINT data that was  
669 imported to Cytoscape 3.6.0. Known prey-prey interactions were obtained from the  
670 iRef database (<http://irefindex.org>).

671

672 *RNA isolation, reverse transcription and quantitative real-time PCR from DUX4 TetOn*  
673 *hESCs*

674 Total RNA was isolated using NucleoSpin RNA kit (Macherey Nagel). 1 $\mu$ g of RNA  
675 was reverse transcribed by MMLV-RTase with oligo dT, dNTPs, and Ribolock in  
676 MMLV-RTase buffer (Thermo Fisher Scientific). 5 $\times$  HOT FIREPol qPCR Mix (Solis  
677 Biodyne) was used to measure relative mRNA levels with LightCycler (Roche). The  
678  $\Delta \Delta$  CT method was followed to quantify the relative gene expression where  
679 *CYCLOPHILIN G* was used as endogenous control. Relative expression of each gene  
680 was normalized to the expression without doxycycline treatment. The primer sequences  
681 are listed in Extended Data Table 7.

682

683 *ATAC-sequencing library preparation and data analysis*

684 The ATAC-sequencing libraries were prepared as in <sup>88</sup>. 5 $\times$ 10<sup>4</sup> EmGFP (-) and EmGFP  
685 (+) TetOn-hESCs (H1 clone 2, H1 clone 8, H9 clone 3 and H9 clone 4) were centrifuged  
686 at 500 $\times$ g for 5 min. The pellets were washed in cold 1 $\times$  PBS by centrifugation at 500 $\times$ g  
687 for 5min. Each cell pellet was lysed in 50  $\mu$ l of cold lysis buffer (10 mM Tris-HCl, pH  
688 7.4; 10 mM NaCl, 3 mM MgCl<sub>2</sub>, and 0.1% IGEPAL CA-630) and centrifuged at 500 $\times$ g  
689 at 4 $^{\circ}$ C for 10 min. The pellet was then resuspended in the transposase reaction mix (2.5

690  $\mu$ l of transposase in TD buffer (Nextera DNA library preparation kit, Illumina) and  
691 incubated at 37°C for 30 min. The reactions were purified through columns and eluted  
692 in 20  $\mu$ l. After addition of the barcode oligos the DNA samples were amplified for 12  
693 cycles (98°C for 10 s, 63°C for 30 s and 72°C for 60 s) in Phusion PCR master mix  
694 (Thermo Fisher Scientific). The PCR products were purified through the columns and  
695 eluted in 20  $\mu$ l.

696

### 697 *ATAC-seq data analysis*

698 Bcl files were converted and demultiplexed to fastq using the bcl2fastq program.  
699 STAR<sup>58</sup> was used to index the human reference genome (hg19), obtained from UCSC,  
700 and align the resulting fastq files. The resulting bam files with the mapped reads were  
701 then converted to tag directories with subsequent peaks calling using the HOMER suite  
702 of programs<sup>54</sup>. HOMER was also employed for counting the reads in the identified peak  
703 regions. The raw tag counts from the peaks were then imported to R/Bioconductor and  
704 differential peak analysis was performed using the edgeR package and its general linear  
705 models pipeline. Peaks with an FDR adjusted p value under 0.05 were termed  
706 significant. Plotting was done in R using packages Complex heatmap, ggplot2 and  
707 ggbeeswarm. RepeatMasker table downloaded from UCSC  
708 (<http://hgdownload.soe.ucsc.edu/goldenPath/hg19/database/rmsk.txt.gz>) was  
709 converted to BED format and then intersected with the ATAC-seq peaks using the  
710 intersectBed from BEDTools<sup>52</sup> to determine the peaks overlapped with ERVL-MaLR  
711 elements. ATAC-seq data of human early embryo were obtained from GSE101571<sup>15</sup>,  
712 and scores around the ATAC-seq peaks were calculated with computeMatrix and

713 visualized with plotHeatmap from deepTools<sup>53</sup>. All the scripts and command line  
714 options can be provided upon request.

715

#### 716 *Immunocytochemistry of human ESC*

717 Cells were fixed with 3.8% PFA, washed three times, permeabilised in 0.5% (v/v)  
718 Triton X-100 in PBS for 7 min, and washed with washing buffer (0.1% (v/v) Tween20  
719 in PBS). The samples were incubated with ProteinBlock (Thermo Fisher Scientific) at  
720 room temperature for 10 min to prevent unspecific binding of primary antibody.  
721 Primary antibody (rabbit MAb anti-DUX4, clone E5-5, Abcam) was diluted 1:300 in  
722 washing buffer and incubated at 4°C overnight. After washings, fluorescence-  
723 conjugated secondary antibody (anti rabbit 594, A-21207; Thermo Fisher Scientific)  
724 was diluted 1:1000 in washing buffer and incubated at room temperature for 20 min.  
725 Nuclei were counterstained with DAPI 1:1000 in washing buffer. The images were  
726 captured with an Evos FL Cell Imaging system using 10× and 20× Plan Achromatic  
727 objectives.

728

#### 729 *Immunocytochemistry of human embryos*

730 For characterization and quantitation of the DUX4 protein zygotes (n=3) and embryos  
731 (2-cell, n=3; 4-cell, n=4; 8-cell, n=2 plus one early 8-cell stage embryo shown in  
732 Extended Data Fig. 1 were fixed in 3.8 % PFA at room temperature for 15 min, washed  
733 three times in washing buffer (as above), and permeabilised in 0.5% Triton X-100 in  
734 PBS at room temperature for 15 min. Unspecific primary antibody binding was blocked  
735 as above. DUX4 antibody (as above) was incubated at 4°C overnight. The embryos

736 were washed and incubated in the secondary antibody (anti-rabbit 488, A-21206;  
737 Thermo Fisher Scientific) diluted 1:500 in washing buffer (as above) at room  
738 temperature for 2 h. After washings, nuclei were counterstained with DAPI 1:500 in  
739 washing buffer. To confirm that DUX4 targeting siRNA efficiently downregulated  
740 *DUX4*, siCTRL (n=4) and siDUX4 (n=5) microinjected zygotes were stained for DUX4  
741 as above.

742

#### 743 *Imaging and confocal microscopy image analysis*

744 Human embryos were imaged in washing buffer on Ibidi 8-well  $\mu$  slides with a Leica  
745 TCS SP8 confocal laser scanning microscope (Leica Microsystems, Mannheim,  
746 Germany) using Leica HC PL APO CS2 40 $\times$ /1.10NA and Leica HC PL APO CS2  
747 63 $\times$ /1.20NA water objectives. Confocal images were processed using Fiji  
748 (<http://fiji.sc>). For the data presented in Fig 1c and d, images were smoothed using a  
749 Gaussian filter (radius = 1 pixel kernel). For the quantification of the DUX4 intensity  
750 in the nucleus (Fig. 1d), the DAPI channel was denoised using a rolling ball (radius =  
751 100). The images were smoothed in 3D using a Gaussian filter (radius = 2 pixel  
752 kernel) and cell nuclei were segmented. The segmented regions were used to measure  
753 average pixel intensity per nucleus in each cell in the DUX4 channel. DUX4 intensity  
754 in the nucleus was normalized to intensity of the corresponding cytoplasmic DUX4  
755 staining in the single representative plane.

756

757 *Culture and microinjection of human embryos*

758 Human triploid zygotes were warmed using a Gems Warming Set (Genea Biomedx)  
759 and cultured in G-TL medium (Vitrolife) in 6%O<sub>2</sub> and 6% CO<sub>2</sub> at 37°C. 12 µl of either  
760 20 µM scrambled control siRNA (AM4611, Thermo Fisher Scientific) or DUX4-  
761 targeting siRNA (cat. 4457308, Thermo Fisher Scientific) diluted in nucleotide-free  
762 H<sub>2</sub>O were mixed with total of 500 ng of GAP-GFP mRNA and centrifuged at maximum  
763 speed at 4°C for 10 min. The embryos were microinjected using Eppendorf  
764 microinjector and placed in G-TL medium in a Geri dish for 3D time-lapse imaging  
765 (Geri incubator, Genea Biomedx, Australia).

766

767 *Human embryo live imaging*

768 Imaging of the human triploid embryos was initiated immediately after microinjections  
769 (Geri incubator). Images were captured in 3D every 15 min until the embryos were  
770 removed for fluorescence staining or termination of the experiment.

771

772 *Ethical approvals*

773 Collection and experiments on human oocytes and embryos were approved by the  
774 Helsinki University Hospital ethical committee, diary numbers 308/13/03/03/2015 and  
775 HUS/1069/2016. Human surplus oocytes, zygotes, and embryos were donated by  
776 couples that had undergone infertility treatments at the Reproduction Medicine Unit of  
777 the Helsinki University Hospital. The donations were done with an informed consent  
778 and patients understood that donating oocytes, zygotes, or embryos is voluntary and  
779 does not affect their treatment in any way.



780

781 *Acknowledgements*

782 We are grateful for all the couples that donated their surplus oocytes, zygotes, or  
783 embryos for this project. We thank the IVF nurses at the Reproductive Medicine Unit  
784 of the Helsinki University Hospital for recruiting the couples for the oocyte and embryo  
785 donation program, Dr. Diego Balboa-Alonso for the pB-ires-EmGFP-pA-PGK-Puro  
786 plasmid and Dr. Jere Weltner for insightful discussions. We acknowledge Biomedicum  
787 Imaging Unit (Helsinki), Functional Genomics Unit (Helsinki), Biomedicum Flow  
788 Cytometry Unit (Helsinki), Bioinformatics and Expression Analysis Core Facility  
789 (Stockholm) for skilled technical assistance. We thank Dr. Jukka Lehtonen for  
790 scientific IT support (Biocenter Finland) and CSC IT Center for Science for  
791 supercomputing. We thank prof. Outi Hovatta for inspiration and introducing the senior  
792 author to the field of early embryogenesis. This project was supported by Jane and  
793 Aatos Erkko foundation, Sigrid Jusélius foundation, Finnish Academy, and Helsinki  
794 University Hospital funds. SV was supported by Jane and Aatos Erkko foundation. MY  
795 was supported by the Scandinavia-Japan Sasakawa Foundation, the Japan Eye Bank  
796 Association, the Astellas Foundation for Research on Metabolic Disorders, and the  
797 Japan Society for the Promotion of Science Overseas Research Fellowships. MT was  
798 supported by Joe, Pentti and Tor Memorial Foundation, Graduate School of Åbo  
799 Akademi University. VR was supported by Foundation of Åbo Akademi University  
800 and Magnus Ehrnrooth Foundation.

801

802 *Contributions*

803 SV, SK and JK conceived and coordinated the study. YM, TRB, MV, MSJ, TT, SK  
804 and JK supervised the work in each contributing laboratory. Every author participated  
805 in either planning or conducting respective experiments and analysing or interpreting  
806 the data. SV, MY, VR, TA, MT, MSJ, JK wrote the manuscript. All authors approved  
807 the final version of the manuscript.

808

809 *Competing interests*

810 The authors declare no competing interests.

811

812 *Supplementary information*

813 *This manuscript contains Supplementary Information.*

814

815 **Supplementary Information 1. Supplementary file showing expression levels and**  
816 **statistical results of the differential expression in qualified siCTRL and siDUX4**  
817 **blastomeres.** The descriptions of the columns are available at:

818 <https://github.com/shka/STRTprep/blob/v3dev/doc/result.md#outbygenediffexpxls>

819

820 **Supplementary Information 2. Supplementary file showing expression levels and**  
821 **statistical results of the differential expression on qualified DUX4 TetOn hESC**  
822 **samples.** The descriptions of the columns are available at:

823 <https://github.com/shka/STRTprep/blob/v3dev/doc/result.md#outbygenediffexpxls>

824

825 **Supplementary Information 3.** Supplementary table showing significantly  
826 differentially expressed enhancers in Dox (+) versus Dox (-) DUX4 TetOn hESCs.

827

828 **Supplementary Information 4.** Supplementary table showing significantly  
829 differentially expressed promoters in Dox (+) versus Dox (-) DUX4 TetOn hESCs.

830

831 **Supplementary Information 5.** Supplementary table showing DUX family proteins  
832 in primates.

833

834 **Supplementary information 6.** Supplementary table showing coordinates (KIX-  
835 9aaTAD-KBM.pdb) for modeled KIX in complex with DUX4 9aaTAD and KBM  
836 peptides.

837

838 **Supplementary information 7.** Supplementary table showing coordinates  
839 (DUX4\_HD1-HD2.pdb) of DUX4 HD1-HD2 *without* bound DNA at the end of a 100  
840 ns molecular dynamics simulation.

841

842 **Supplementary information 8.** Two concatenated supplementary movies.

843 First, 360° view of last sampled conformation of DNA-free DUX4 (blue) from the  
844 100 ns simulation superposed on the DNA-bound DUX4 crystal structure (red and  
845 grey) (HD1-HD2-comparison.mp4). Second, molecular dynamics simulation (100 ns)  
846 of DUX4 HD1-HD2 *without* bound DNA (HD1-HD2.mp4).

847

848 **Supplementary Information 9.** Supplementary table showing transient (BioID) and  
849 stable (AP-MS) DUX4 protein – protein interactions as well as interactions found by  
850 both BioID and AP-MS methods (both).

851

852 *References*

- 853 1 Jukam, D., Shariati, S. A. M. & Skotheim, J. M. Zygotic Genome Activation  
854 in Vertebrates. *Developmental cell* **42**, 316-332,  
855 doi:10.1016/j.devcel.2017.07.026 (2017).
- 856 2 Conti, M. & Franciosi, F. Acquisition of oocyte competence to develop as an  
857 embryo: integrated nuclear and cytoplasmic events. *Human reproduction*  
858 *update* **24**, 245-266, doi:10.1093/humupd/dmx040 (2018).
- 859 3 De Iaco, A. *et al.* DUX-family transcription factors regulate zygotic genome  
860 activation in placental mammals. *Nat Genet* **49**, 941-945, doi:10.1038/ng.3858  
861 (2017).
- 862 4 Hendrickson, P. G. *et al.* Conserved roles of mouse DUX and human DUX4 in  
863 activating cleavage-stage genes and MERVL/HERVL retrotransposons.  
864 *Nature genetics* **49**, 925-934, doi:10.1038/ng.3844 (2017).
- 865 5 Geng, L. N. *et al.* DUX4 activates germline genes, retroelements, and immune  
866 mediators: implications for facioscapulohumeral dystrophy. *Developmental*  
867 *cell* **22**, 38-51, doi:10.1016/j.devcel.2011.11.013 (2012).
- 868 6 Whiddon, J. L., Langford, A. T., Wong, C. J., Zhong, J. W. & Tapscott, S. J.  
869 Conservation and innovation in the DUX4-family gene network. *Nat Genet*  
870 **49**, 935-940, doi:10.1038/ng.3846 (2017).
- 871 7 Tohonen, V. *et al.* Transcriptional activation of early human development  
872 suggests DUX4 as an embryonic regulator. doi:<https://doi.org/10.1101/123208>  
873 (2017).
- 874 8 Tohonen, V. *et al.* Novel PRD-like homeodomain transcription factors and  
875 retrotransposon elements in early human development. *Nature*  
876 *communications* **6**, 8207, doi:10.1038/ncomms9207 (2015).
- 877 9 McGrath, S. A., Esquela, A. F. & Lee, S. J. Oocyte-specific expression of  
878 growth/differentiation factor-9. *Molecular endocrinology* **9**, 131-136,  
879 doi:10.1210/mend.9.1.7760846 (1995).
- 880 10 Canosa, S. *et al.* Zona pellucida gene mRNA expression in human oocytes is  
881 related to oocyte maturity, zona inner layer retardance and fertilization  
882 competence. *Molecular human reproduction* **23**, 292-303,  
883 doi:10.1093/molehr/gax008 (2017).
- 884 11 Komljenovic, A., Roux, J., Wollbrett, J., Robinson-Rechavi, M. & Bastian, F.  
885 B. BgeeDB, an R package for retrieval of curated expression datasets and for  
886 gene list expression localization enrichment tests. *F1000Research* **5**, 2748,  
887 doi:10.12688/f1000research.9973.2 (2016).
- 888 12 Langfelder, P. & Horvath, S. WGCNA: an R package for weighted correlation  
889 network analysis. *BMC bioinformatics* **9**, 559, doi:10.1186/1471-2105-9-559  
890 (2008).

- 891 13 Young, J. M. *et al.* DUX4 binding to retroelements creates promoters that are  
892 active in FSHD muscle and testis. *PLoS genetics* **9**, e1003947,  
893 doi:10.1371/journal.pgen.1003947 (2013).
- 894 14 Jouhilahti, E. M. *et al.* The human PRD-like homeobox gene LEUTX has a  
895 central role in embryo genome activation. *Development* **143**, 3459-3469,  
896 doi:10.1242/dev.134510 (2016).
- 897 15 Wu, J. *et al.* Chromatin analysis in human early development reveals  
898 epigenetic transition during ZGA. *Nature* **557**, 256-260, doi:10.1038/s41586-  
899 018-0080-8 (2018).
- 900 16 Hirabayashi, S. *et al.* NET-CAGE characterizes the dynamics and topology of  
901 human transcribed cis-regulatory elements. *Nat Genet* **51**, 1369-1379,  
902 doi:10.1038/s41588-019-0485-9 (2019).
- 903 17 Andersson, R. *et al.* An atlas of active enhancers across human cell types and  
904 tissues. *Nature* **507**, 455-461, doi:10.1038/nature12787 (2014).
- 905 18 Arner, E. *et al.* Transcribed enhancers lead waves of coordinated transcription  
906 in transitioning mammalian cells. *Science* **347**, 1010-1014,  
907 doi:10.1126/science.1259418 (2015).
- 908 19 Weltner, J. *et al.* Human pluripotent reprogramming with CRISPR activators.  
909 *Nature communications* **9**, 2643, doi:10.1038/s41467-018-05067-x (2018).
- 910 20 Mitsuhashi, H. *et al.* Functional domains of the FSHD-associated DUX4  
911 protein. *Biology open* **7**, doi:10.1242/bio.033977 (2018).
- 912 21 Katayama, S. *et al.* Phylogenetic and mutational analyses of human LEUTX, a  
913 homeobox gene implicated in embryogenesis. *Scientific reports* **8**, 17421,  
914 doi:10.1038/s41598-018-35547-5 (2018).
- 915 22 Piskacek, M., Havelka, M., Rezacova, M. & Knight, A. The 9aaTAD  
916 Transactivation Domains: From Gal4 to p53. *PloS one* **11**, e0162842,  
917 doi:10.1371/journal.pone.0162842 (2016).
- 918 23 Choi, S. H. *et al.* DUX4 recruits p300/CBP through its C-terminus and  
919 induces global H3K27 acetylation changes. *Nucleic acids research* **44**, 5161-  
920 5173, doi:10.1093/nar/gkw141 (2016).
- 921 24 Bruschweiler, S., Konrat, R. & Tollinger, M. Allosteric communication in the  
922 KIX domain proceeds through dynamic repacking of the hydrophobic core.  
923 *ACS chemical biology* **8**, 1600-1610, doi:10.1021/cb4002188 (2013).
- 924 25 Lee, J. K. *et al.* Crystal Structure of the Double Homeodomain of DUX4 in  
925 Complex with DNA. *Cell reports* **25**, 2955-2962 e2953,  
926 doi:10.1016/j.celrep.2018.11.060 (2018).
- 927 26 Dong, X. *et al.* Structural basis of DUX4/IGH-driven transactivation.  
928 *Leukemia* **32**, 1466-1476, doi:10.1038/s41375-018-0093-1 (2018).
- 929 27 Varjosalo, M. *et al.* Interlaboratory reproducibility of large-scale human  
930 protein-complex analysis by standardized AP-MS. *Nature methods* **10**, 307-  
931 314, doi:10.1038/nmeth.2400 (2013).
- 932 28 Liu, X. *et al.* An AP-MS- and BioID-compatible MAC-tag enables  
933 comprehensive mapping of protein interactions and subcellular localizations.  
934 *Nature communications* **9**, 1188, doi:10.1038/s41467-018-03523-2 (2018).

- 935 29 Yan, L. *et al.* Single-cell RNA-Seq profiling of human preimplantation  
936 embryos and embryonic stem cells. *Nature structural & molecular biology* **20**,  
937 1131-1139, doi:10.1038/nsmb.2660 (2013).
- 938 30 Tadros, W. & Lipshitz, H. D. The maternal-to-zygotic transition: a play in two  
939 acts. *Development* **136**, 3033-3042, doi:10.1242/dev.033183 (2009).
- 940 31 Walser, C. B. & Lipshitz, H. D. Transcript clearance during the maternal-to-  
941 zygotic transition. *Current opinion in genetics & development* **21**, 431-443,  
942 doi:10.1016/j.gde.2011.03.003 (2011).
- 943 32 Lee, M. T., Bonneau, A. R. & Giraldez, A. J. Zygotic genome activation  
944 during the maternal-to-zygotic transition. *Annual review of cell and*  
945 *developmental biology* **30**, 581-613, doi:10.1146/annurev-cellbio-100913-  
946 013027 (2014).
- 947 33 Schultz, R. M., Stein, P. & Svoboda, P. The oocyte-to-embryo transition in  
948 mouse: past, present, and future. *Biology of reproduction* **99**, 160-174,  
949 doi:10.1093/biolre/i0y013 (2018).
- 950 34 Chen, Z. & Zhang, Y. Loss of DUX causes minor defects in zygotic genome  
951 activation and is compatible with mouse development. *Nat Genet* **51**, 947-951,  
952 doi:10.1038/s41588-019-0418-7 (2019).
- 953 35 De Iaco, A., Verp S., Offner S., Trono D. DUX is a non-essential synchronizer  
954 of zygotic genome activation. doi:<https://doi.org/10.1101/569434> (2019).
- 955 36 Leng, L. *et al.* Single-Cell Transcriptome Analysis of Uniparental Embryos  
956 Reveals Parent-of-Origin Effects on Human Preimplantation Development.  
957 *Cell stem cell* **25**, 697-712 e696, doi:10.1016/j.stem.2019.09.004 (2019).
- 958 37 Thompson, P. J., Macfarlan, T. S. & Lorincz, M. C. Long Terminal Repeats:  
959 From Parasitic Elements to Building Blocks of the Transcriptional Regulatory  
960 Repertoire. *Molecular cell* **62**, 766-776, doi:10.1016/j.molcel.2016.03.029  
961 (2016).
- 962 38 Nishihara, H. *et al.* Coordinately Co-opted Multiple Transposable Elements  
963 Constitute an Enhancer for *wnt5a* Expression in the Mammalian Secondary  
964 Palate. *PLoS genetics* **12**, e1006380, doi:10.1371/journal.pgen.1006380  
965 (2016).
- 966 39 Franke, V. *et al.* Long terminal repeats power evolution of genes and gene  
967 expression programs in mammalian oocytes and zygotes. *Genome research*  
968 **27**, 1384-1394, doi:10.1101/gr.216150.116 (2017).
- 969 40 Georgiou, I. *et al.* Retrotransposon RNA expression and evidence for  
970 retrotransposition events in human oocytes. *Human molecular genetics* **18**,  
971 1221-1228, doi:10.1093/hmg/ddp022 (2009).
- 972 41 Kruse K., D. N., Enriquez-Gasca R., Gaume X., Torres-Padilla M-E.,  
973 Vaquerizas JM. Transposable elements drive reorganisation of 3D chromatin  
974 during early embryogenesis. doi:<https://doi.org/10.1101/523712> (2019).
- 975 42 Meng, H. & Bartholomew, B. Emerging roles of transcriptional enhancers in  
976 chromatin looping and promoter-proximal pausing of RNA polymerase II. *The*  
977 *Journal of biological chemistry* **293**, 13786-13794,  
978 doi:10.1074/jbc.R117.813485 (2018).



- 979 43 Quevedo, M. *et al.* Mediator complex interaction partners organize the  
980 transcriptional network that defines neural stem cells. *Nature communications*  
981 **10**, 2669, doi:10.1038/s41467-019-10502-8 (2019).
- 982 44 Petrenko, N., Jin, Y., Wong, K. H. & Struhl, K. Mediator Undergoes a  
983 Compositional Change during Transcriptional Activation. *Molecular cell* **64**,  
984 443-454, doi:10.1016/j.molcel.2016.09.015 (2016).
- 985 45 Jeronimo, C. *et al.* Tail and Kinase Modules Differently Regulate Core  
986 Mediator Recruitment and Function In Vivo. *Molecular cell* **64**, 455-466,  
987 doi:10.1016/j.molcel.2016.09.002 (2016).
- 988 46 Islam, S. *et al.* Highly multiplexed and strand-specific single-cell RNA 5' end  
989 sequencing. *Nature protocols* **7**, 813-828, doi:10.1038/nprot.2012.022 (2012).
- 990 47 Islam, S. *et al.* Quantitative single-cell RNA-seq with unique molecular  
991 identifiers. *Nature methods* **11**, 163-166, doi:10.1038/nmeth.2772 (2014).
- 992 48 Krjutskov, K. *et al.* Single-cell transcriptome analysis of endometrial tissue.  
993 *Human reproduction* **31**, 844-853, doi:10.1093/humrep/dew008 (2016).
- 994 49 Katayama, S., Tohonon, V., Linnarsson, S. & Kere, J. SAMstr: statistical test  
995 for differential expression in single-cell transcriptome with spike-in  
996 normalization. *Bioinformatics* **29**, 2943-2945,  
997 doi:10.1093/bioinformatics/btt511 (2013).
- 998 50 Li, J. & Tibshirani, R. Finding consistent patterns: a nonparametric approach  
999 for identifying differential expression in RNA-Seq data. *Statistical methods in*  
1000 *medical research* **22**, 519-536, doi:10.1177/0962280211428386 (2013).
- 1001 51 Brennecke, P. *et al.* Accounting for technical noise in single-cell RNA-seq  
1002 experiments. *Nature methods* **10**, 1093-1095, doi:10.1038/nmeth.2645 (2013).
- 1003 52 Quinlan, A. R. & Hall, I. M. BEDTools: a flexible suite of utilities for  
1004 comparing genomic features. *Bioinformatics* **26**, 841-842,  
1005 doi:10.1093/bioinformatics/btq033 (2010).
- 1006 53 Ramirez, F., Dundar, F., Diehl, S., Gruning, B. A. & Manke, T. deepTools: a  
1007 flexible platform for exploring deep-sequencing data. *Nucleic acids research*  
1008 **42**, W187-191, doi:10.1093/nar/gku365 (2014).
- 1009 54 Heinz, S. *et al.* Simple combinations of lineage-determining transcription  
1010 factors prime cis-regulatory elements required for macrophage and B cell  
1011 identities. *Molecular cell* **38**, 576-589, doi:10.1016/j.molcel.2010.05.004  
1012 (2010).
- 1013 55 Oki, S. *et al.* ChIP-Atlas: a data-mining suite powered by full integration of  
1014 public ChIP-seq data. *EMBO reports* **19**, doi:10.15252/embr.201846255  
1015 (2018).
- 1016 56 Murata, M. *et al.* Detecting expressed genes using CAGE. *Methods in*  
1017 *molecular biology* **1164**, 67-85, doi:10.1007/978-1-4939-0805-9\_7 (2014).
- 1018 57 Hasegawa, A., Daub, C., Carninci, P., Hayashizaki, Y. & Lassmann, T.  
1019 MOIRAI: a compact workflow system for CAGE analysis. *BMC*  
1020 *bioinformatics* **15**, 144, doi:10.1186/1471-2105-15-144 (2014).
- 1021 58 Dobin, A. *et al.* STAR: ultrafast universal RNA-seq aligner. *Bioinformatics*  
1022 **29**, 15-21, doi:10.1093/bioinformatics/bts635 (2013).

- 1023 59 Harrow, J. *et al.* GENCODE: the reference human genome annotation for The  
1024 ENCODE Project. *Genome research* **22**, 1760-1774,  
1025 doi:10.1101/gr.135350.111 (2012).
- 1026 60 Consortium, F. *et al.* A promoter-level mammalian expression atlas. *Nature*  
1027 **507**, 462-470, doi:10.1038/nature13182 (2014).
- 1028 61 Robinson, M. D., McCarthy, D. J. & Smyth, G. K. edgeR: a Bioconductor  
1029 package for differential expression analysis of digital gene expression data.  
1030 *Bioinformatics* **26**, 139-140, doi:10.1093/bioinformatics/btp616 (2010).
- 1031 62 McCarthy, D. J., Chen, Y. & Smyth, G. K. Differential expression analysis of  
1032 multifactor RNA-Seq experiments with respect to biological variation. *Nucleic*  
1033 *acids research* **40**, 4288-4297, doi:10.1093/nar/gks042 (2012).
- 1034 63 Balboa, D. *et al.* Conditionally Stabilized dCas9 Activator for Controlling  
1035 Gene Expression in Human Cell Reprogramming and Differentiation. *Stem*  
1036 *cell reports* **5**, 448-459, doi:10.1016/j.stemcr.2015.08.001 (2015).
- 1037 64 Cermak, T. *et al.* Efficient design and assembly of custom TALEN and other  
1038 TAL effector-based constructs for DNA targeting. *Nucleic acids research* **39**,  
1039 e82, doi:10.1093/nar/gkr218 (2011).
- 1040 65 Hermann, M., Cermak, T., Voytas, D. F. & Pelczar, P. Mouse genome  
1041 engineering using designer nucleases. *Journal of visualized experiments :*  
1042 *JoVE*, doi:10.3791/50930 (2014).
- 1043 66 Tang, F. *et al.* RNA-Seq analysis to capture the transcriptome landscape of a  
1044 single cell. *Nature protocols* **5**, 516-535, doi:10.1038/nprot.2009.236 (2010).
- 1045 67 Johnson, M. *et al.* NCBI BLAST: a better web interface. *Nucleic acids*  
1046 *research* **36**, W5-9, doi:10.1093/nar/gkn201 (2008).
- 1047 68 Katoh, K. & Standley, D. M. MAFFT multiple sequence alignment software  
1048 version 7: improvements in performance and usability. *Molecular biology and*  
1049 *evolution* **30**, 772-780, doi:10.1093/molbev/mst010 (2013).
- 1050 69 Cheng, J., Randall, A. Z., Sweredoski, M. J. & Baldi, P. SCRATCH: a protein  
1051 structure and structural feature prediction server. *Nucleic acids research* **33**,  
1052 W72-76, doi:10.1093/nar/gki396 (2005).
- 1053 70 Wang, S., Li, W., Liu, S. & Xu, J. RaptorX-Property: a web server for protein  
1054 structure property prediction. *Nucleic acids research* **44**, W430-435,  
1055 doi:10.1093/nar/gkw306 (2016).
- 1056 71 Piskacek, S. *et al.* Nine-amino-acid transactivation domain: establishment and  
1057 prediction utilities. *Genomics* **89**, 756-768, doi:10.1016/j.ygeno.2007.02.003  
1058 (2007).
- 1059 72 Berman, H. M. *et al.* The Protein Data Bank. *Nucleic acids research* **28**, 235-  
1060 242, doi:10.1093/nar/28.1.235 (2000).
- 1061 73 Lehtonen, J. V. *et al.* BODIL: a molecular modeling environment for  
1062 structure-function analysis and drug design. *Journal of computer-aided*  
1063 *molecular design* **18**, 401-419, doi:10.1007/s10822-004-3752-4 (2004).
- 1064 74 Studier, F. W. Protein production by auto-induction in high density shaking  
1065 cultures. *Protein expression and purification* **41**, 207-234,  
1066 doi:10.1016/j.pep.2005.01.016 (2005).



- 1067 75 Pettersen, E. F. *et al.* UCSF Chimera--a visualization system for exploratory  
1068 research and analysis. *Journal of computational chemistry* **25**, 1605-1612,  
1069 doi:10.1002/jcc.20084 (2004).
- 1070 76 Maier, J. A. *et al.* ff14SB: Improving the Accuracy of Protein Side Chain and  
1071 Backbone Parameters from ff99SB. *Journal of chemical theory and*  
1072 *computation* **11**, 3696-3713, doi:10.1021/acs.jctc.5b00255 (2015).
- 1073 77 Zgarbova, M. *et al.* Refinement of the Sugar-Phosphate Backbone Torsion  
1074 Beta for AMBER Force Fields Improves the Description of Z- and B-DNA.  
1075 *Journal of chemical theory and computation* **11**, 5723-5736,  
1076 doi:10.1021/acs.jctc.5b00716 (2015).
- 1077 78 Jorgensen, W., Chandrasekhar, J. & Madura, J. Comparison of simple  
1078 potential functions for simulating liquid water. *The Journal of chemical*  
1079 *physics* **79**, doi: <https://doi.org/10.1063/1.445869> (1983).
- 1080 79 Essmann, U. *et al.* A smooth particle mesh Ewald method. *The Journal of*  
1081 *chemical physics* **103**, 8577-8593, doi:10.1063/1.470117 (1995).
- 1082 80 Tamirat, M. Z., Koivu, M., Elenius, K. & Johnson, M. S. Structural  
1083 characterization of EGFR exon 19 deletion mutation using molecular  
1084 dynamics simulation. *PloS one* **14**, e0222814,  
1085 doi:10.1371/journal.pone.0222814 (2019).
- 1086 81 Roe, D. R. & Cheatham, T. E., 3rd. PTRAJ and CPPTRAJ: Software for  
1087 Processing and Analysis of Molecular Dynamics Trajectory Data. *Journal of*  
1088 *chemical theory and computation* **9**, 3084-3095, doi:10.1021/ct400341p  
1089 (2013).
- 1090 82 Humphrey, W., Dalke, A. & Schulten, K. VMD: visual molecular dynamics.  
1091 *Journal of molecular graphics* **14**, 33-38, 27-38, doi:10.1016/0263-  
1092 7855(96)00018-5 (1996).
- 1093 83 Choi, H. *et al.* SAINT: probabilistic scoring of affinity purification-mass  
1094 spectrometry data. *Nature methods* **8**, 70-73, doi:10.1038/nmeth.1541 (2011).
- 1095 84 Mellacheruvu, D. *et al.* The CRAPome: a contaminant repository for affinity  
1096 purification-mass spectrometry data. *Nature methods* **10**, 730-736,  
1097 doi:10.1038/nmeth.2557 (2013).
- 1098 85 Wang, J., Vasaikar, S., Shi, Z., Greer, M. & Zhang, B. WebGestalt 2017: a  
1099 more comprehensive, powerful, flexible and interactive gene set enrichment  
1100 analysis toolkit. *Nucleic acids research* **45**, W130-W137,  
1101 doi:10.1093/nar/gkx356 (2017).
- 1102 86 Meldal, B. H. *et al.* The complex portal--an encyclopaedia of macromolecular  
1103 complexes. *Nucleic acids research* **43**, D479-484, doi:10.1093/nar/gku975  
1104 (2015).
- 1105 87 Giurgiu, M. *et al.* CORUM: the comprehensive resource of mammalian  
1106 protein complexes-2019. *Nucleic acids research* **47**, D559-D563,  
1107 doi:10.1093/nar/gky973 (2019).
- 1108 88 Buenrostro, J. D., Wu, B., Chang, H. Y. & Greenleaf, W. J. ATAC-seq: A  
1109 Method for Assaying Chromatin Accessibility Genome-Wide. *Current*

1110            *protocols in molecular biology* **109**, 21 29 21-29,  
1111            doi:10.1002/0471142727.mb2129s109 (2015).  
1112

## Figure 1

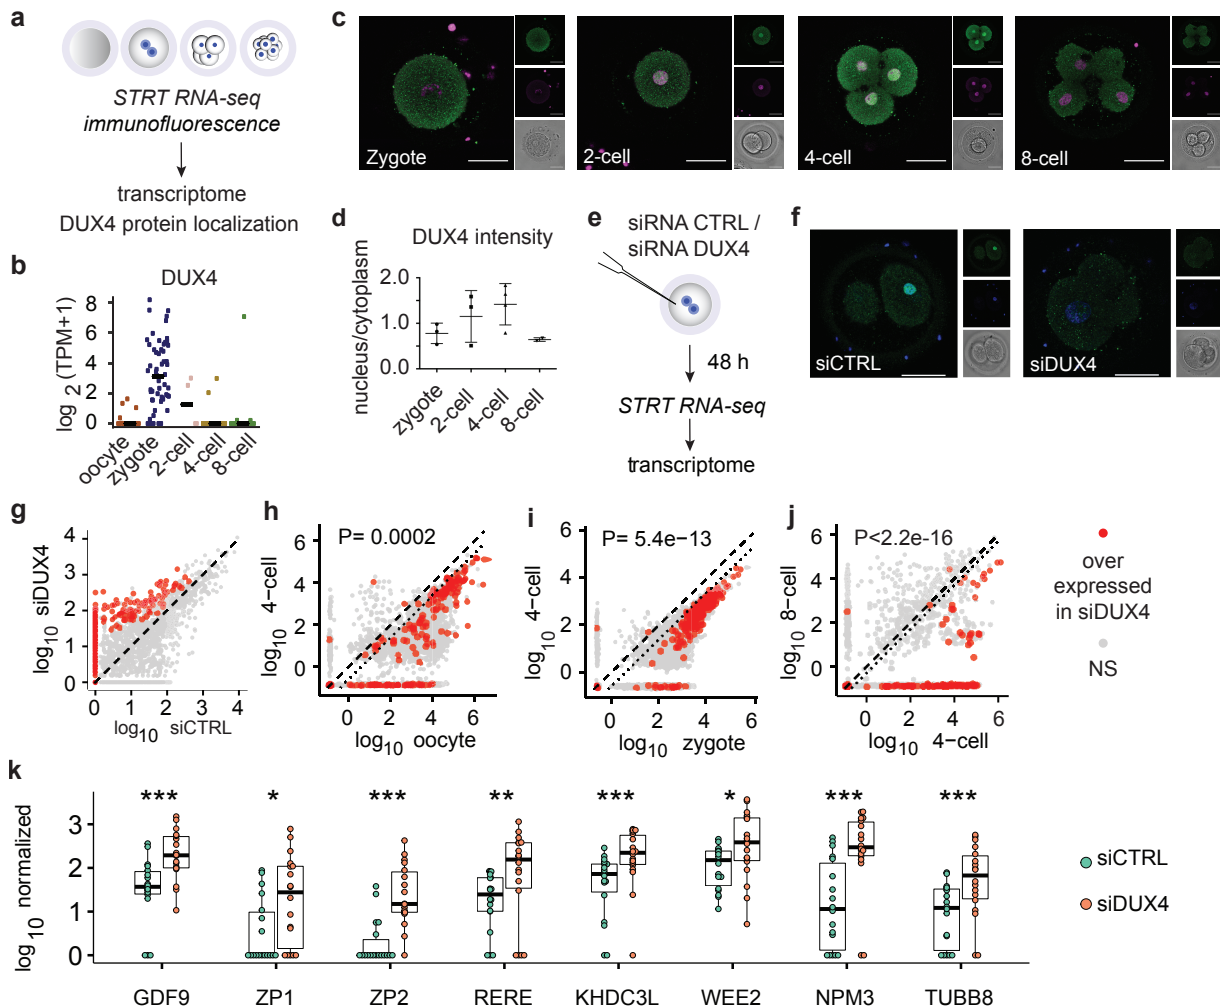

**Figure 1. DUX4 knockdown leads to dysregulation of the maternal transcriptome in the human embryo.**

(a) Schematic of the experimental design. (b) Log<sub>2</sub> TPM (Transcripts Per Kilobase Million) of DUX4 mRNA reads in human MII oocytes (n=20), zygotes (n=59), 2-cell (n=4), 4-cell (n=15), and 8-cell (n=14) embryos. (c) Representative confocal images of zygotes (n=3), 2-cell (n=3) 4-cell (n=4), and 8-cell (n=2) human embryos stained with monoclonal DUX4 antibody E5-5 (green). Nuclei counterstained with DAPI (magenta). The larger left image of each panel shows the composite of the two small fluorescent images on the right for each stage. (d) Quantification of the DUX4 staining intensity in the nucleus normalized to the intensity in the cytoplasm. The samples as in 1c. Data are mean ±SD. (e) siRNA experimental design. (f) Representative images of human embryos immunostained with DUX4 antibody (green) 24 h after microinjection with either control siRNA (n=4) or DUX4 targeting siRNA (n=5). Nuclei counterstained with DAPI (blue). Left side of each panel is a composite of individual corresponding z planes for DUX4 staining, nuclear staining, and the bright field channel (shown on the right side). Scale bar 50 μm. (g) Scatter plot of the expression levels of TFes of siCTRL (n= 18 cells from two embryos) versus siDUX4 embryos (n=18 cells from three embryos). Red dots represent significantly upregulated TFes in siDUX4 embryos while grey dots represent TFes with no significant change. (h-j) Using the oocyte to embryo transition data from Töhönen et al. 2015, we identified the TFes present in our siCTRL versus siDUX4 data (g) and plotted them as follows h: oocyte to 4-cell, i: zygote to 4-cell, and j: 4-cell to 8-cell. The dotted line marks the cell division effect on cellular RNA content. The red dots are the upregulated TFes identified in g. Note that they are downregulated in 4 cell embryos versus oocyte or zygote, and 8 cell versus 4 cell embryos, while in the DUX4 knock-down (siDUX4, g) they remain high, i.e. are not down regulated. P-values were calculated with Fisher's exact test for the frequency of the siDUX4-upregulated TFes of the TFes normally downregulated during respective stages. (k) Expression levels of selected oocyte-specific genes in siCTRL and siDUX4 embryos. Wilcoxon test. Asterisks represent statistical significant changes. \*\*\*q<0.001; \*\*q<0.01; \*q<0.05. Horizontal lines represent the median values in each group.

**Figure 2**

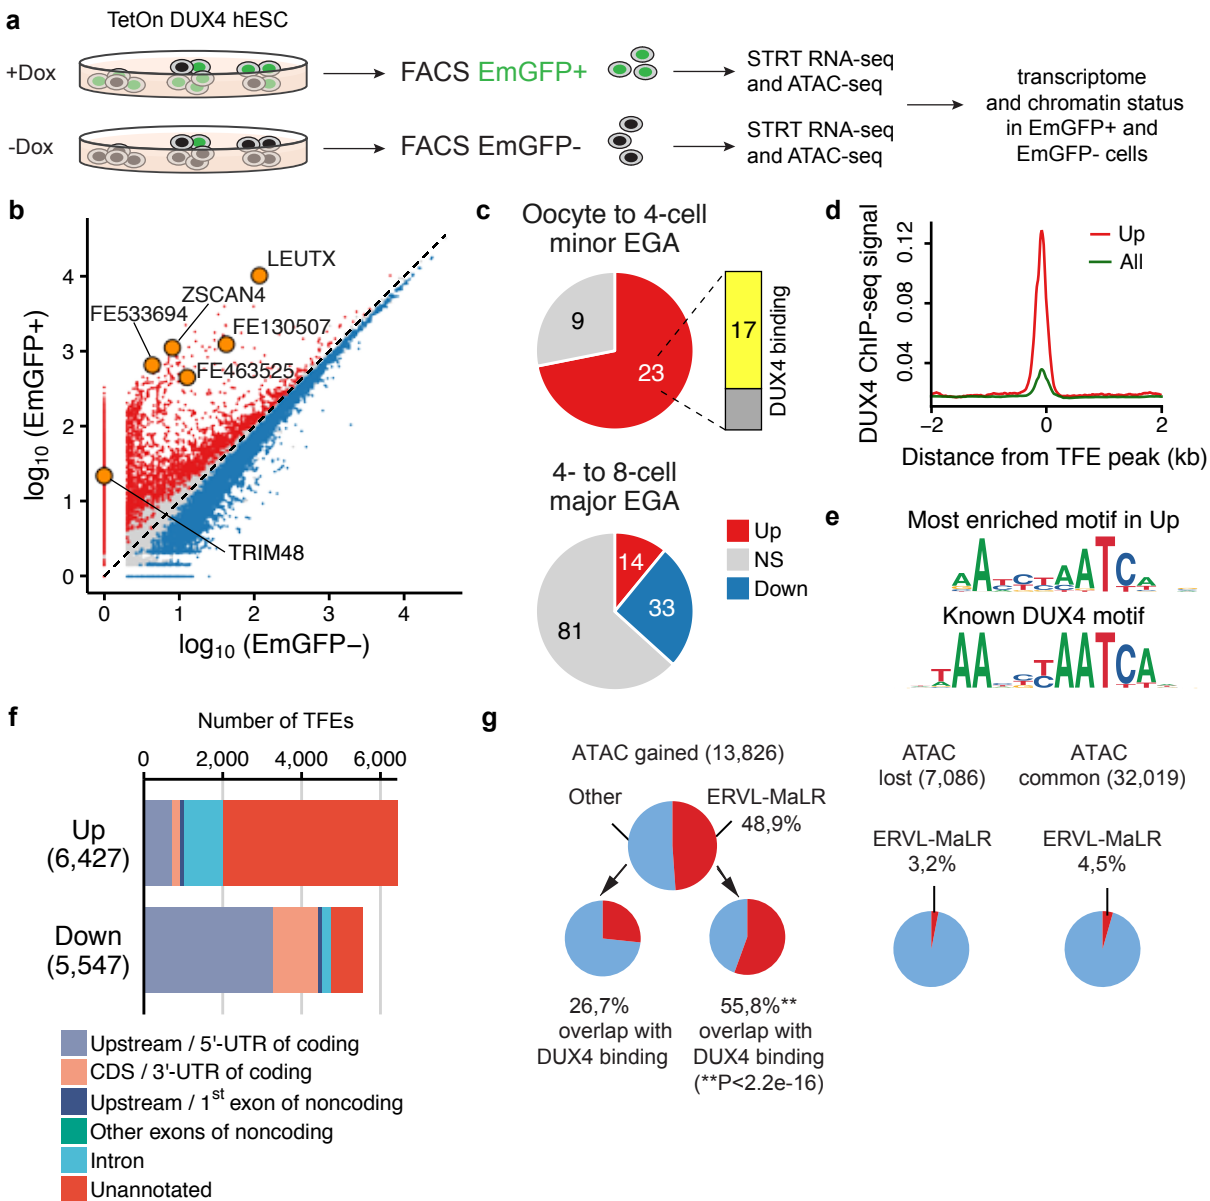

**Figure 2. DUX4 causes upregulation of intergenic genome regions and minor embryo genome activation transcripts in human embryonic stem cells.** (a) Schematic overview of the experimental design. (b) Overexpressed (red), downregulated (blue), and non-significantly changed (grey) TFEs after DUX4 induction (EmGFP (+) cells. Three samples from two clones of each DUX4 TetOn hESC lines (H1 and H9) were FACS sorted and collected per indicated condition. (c) Proportion of the upregulated (Up), downregulated (Down), and non-significantly changed (NS) TFEs upon DUX4 induction as in (b) among the minor (oocyte to 4-cell embryo) and major (4- to 8-cell embryo) embryonic genome activation genes. One TFE out of the 129 major EGA genes annotated on an unassigned chromosome (ChrUn) and was excluded from the analysis. (d) DUX4 ChIP-seq intensity around the peaks of reads within the upregulated TFEs (red) and all the detected TFEs (grey). (e) *De novo* motif enrichment analysis of the DUX4-induced TFEs. Upper panel: the most significantly enriched motif ( $P = 1 \times 10^{-961}$ ) in upregulated (UP) genes using binomial statistical test. Lower panel: the best-matching known binding motif of DUX4 (DUX4 ChIP-seq of myoblasts: GSE7579179; matching score = 0.92). (f) Positional information of the upregulated and downregulated TFEs after DUX4 induction. (g) Proportion of the gained, lost, and common ATAC-seq peaks overlapping ERVL-MaLR regions after DUX4 induction. The samples as in b.

### Figure 3

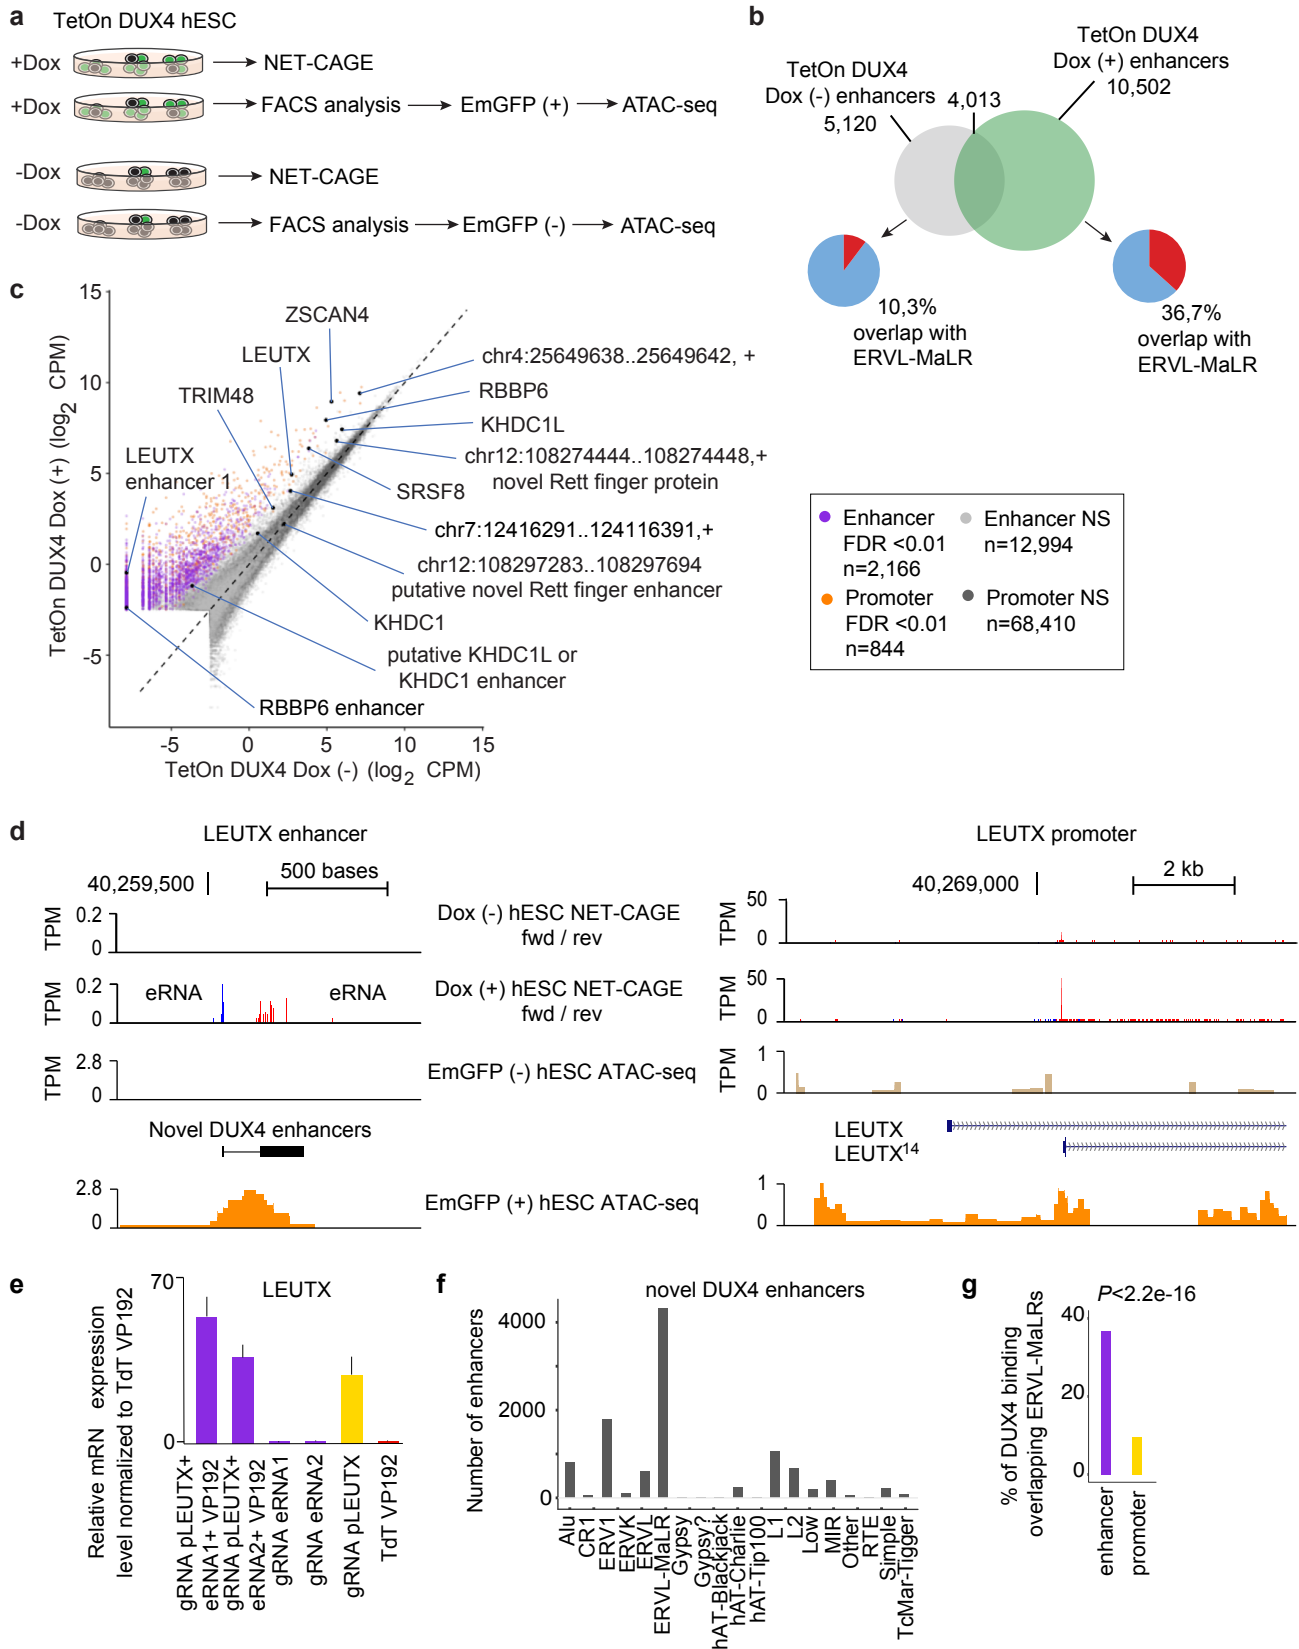

**Figure 3. DUX4 activates newly identified enhancers of the minor embryo genome activation transcripts.**

(a) Experimental design. (b) Venn diagrams of the novel transcribed enhancers identified in TetOn DUX4 Dox (-) (n=two biologically independent samples) and TetOn DUX4 Dox (+) (n=two biologically independent samples) cells. Pie charts show percentage of enhancers overlapping ERVL-MaLR repeat regions. (c) Comparison of TetOn DUX4 Dox (-) hESCs and TetOn DUX4 Dox (+) hESCs NET-CAGE data for promoters and enhancers. Lowly expressed promoters and enhancers with average expression < -2.5 log<sub>2</sub> CPM in TetOn DUX4 Dox (-) hESCs (n=2) and TetOn DUX4 Dox (+) hESCs (n=2) were filtered out. Yellow dots, differentially transcribed promoters (FDR ≤ 0.01); purple dots, differentially transcribed enhancers (FDR ≤ 0.01); dark grey dots, non-significant promoters; light grey dots, non-significant enhancers; black dots, promoters and enhancers for minor embryo genome activation genes. (d) NET-CAGE data shows bidirectional transcription for the putative LEUTX enhancer after DUX4 induction (the Dox (+) cells). ATAC-seq data illustrates open chromatin at the putative LEUTX enhancer region after DUX4 induction (the EmGFP (+) cells). The LEUTX promoter<sup>14</sup> was activated after DUX4 induction (the Dox (+) cells, correlating with open chromatin region (ATAC-seq peaks in the EmGFP (+) cells). (e) Relative expression level of LEUTX in HEK293 cells transfected with the indicated guide RNAs and plasmids. gRNA, guide RNA; eRNA, enhancer RNA; VP192; dCas9 transactivator plasmid; pLEUTX, LEUTX promoter. (f) Novel DUX4 enhancers overlapping with retroelement families. The retroelement families overlapping with at least ten DUX4 enhancers are shown. (g) Proportion of the DUX4 binding sites overlapping ERVL-MaLRs at enhancer or promoter regions.



**Figure 4**

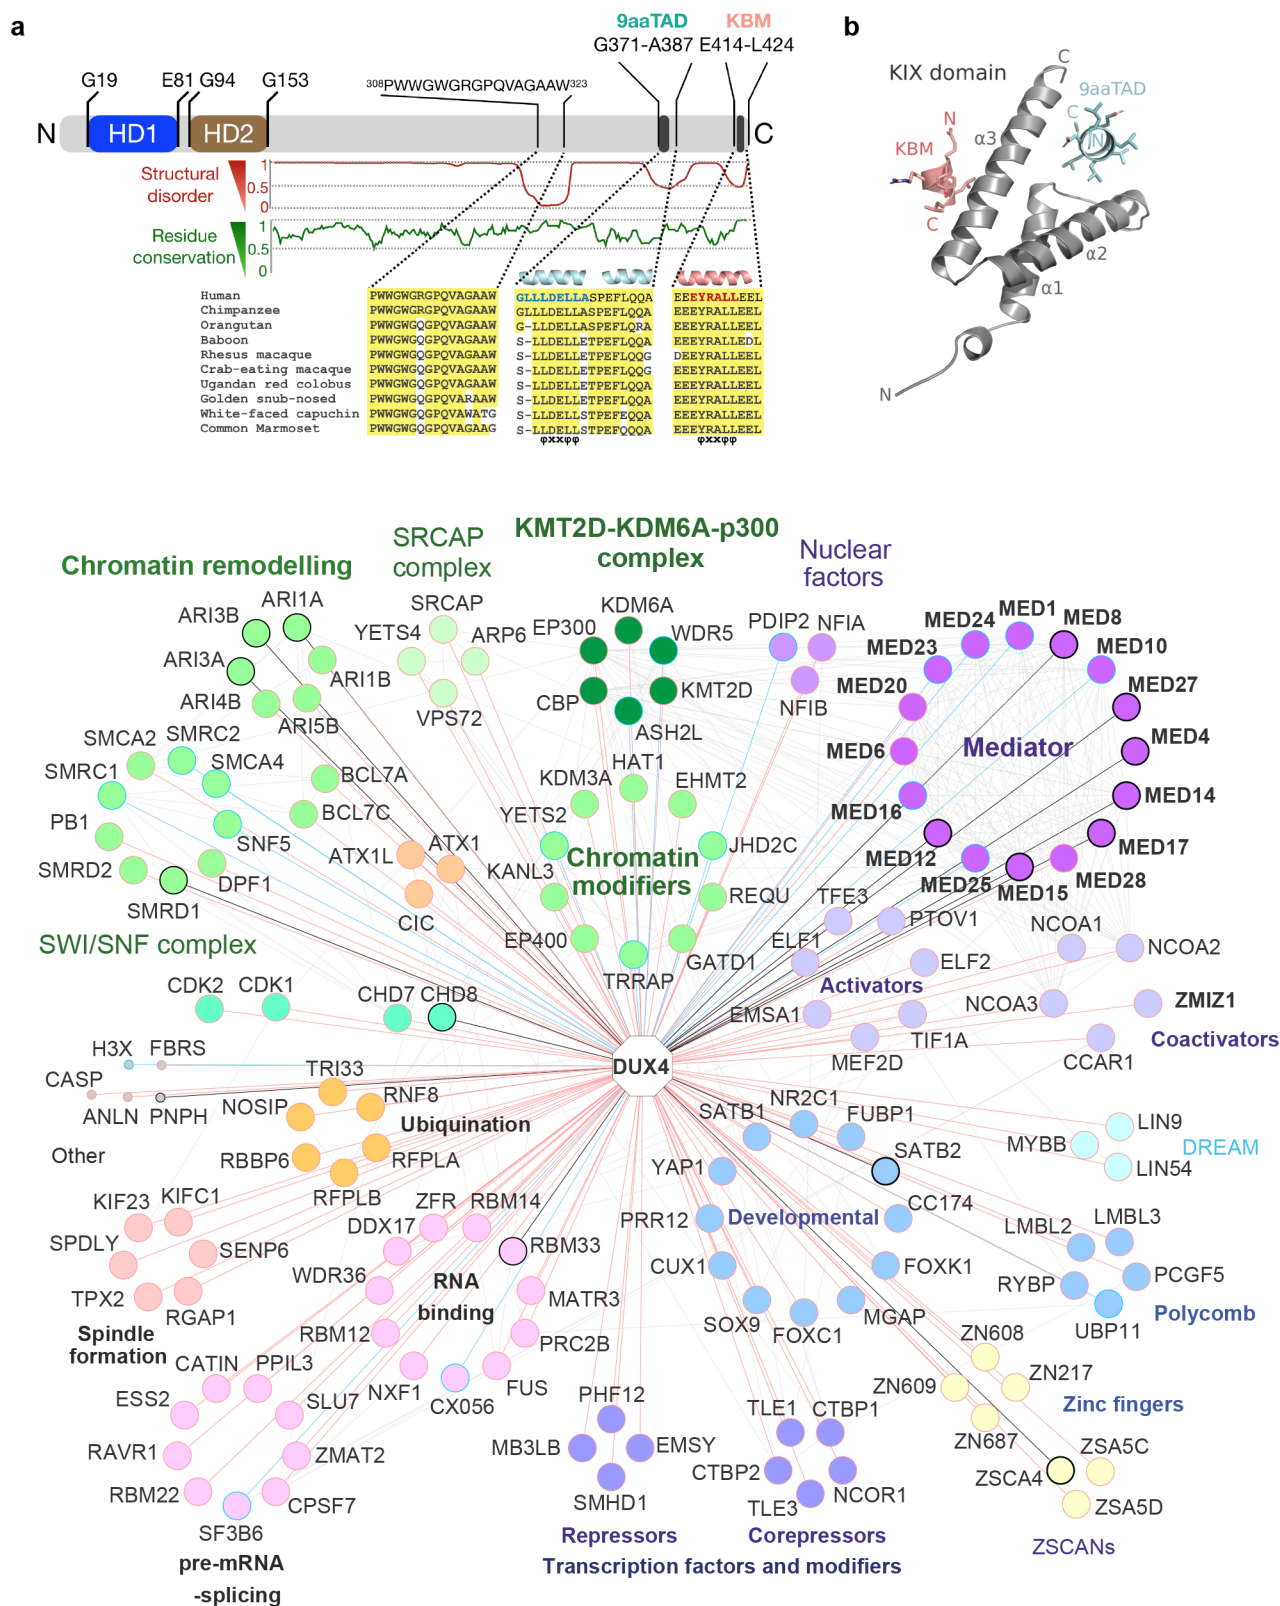

**Figure 4. C-terminus of human DUX4 interacts with the transcriptional Mediator complex and chromatin regulators.**

(a) Domain structure of full-length DUX4: N-terminal homeodomains HD1 and HD2, and C-terminal region. Conservation of residues in primates versus human sequences (green curve) C-terminal to residue G153 and sequence alignment of three conserved regions with a disorder value lower than 0.5 (red curve). Residue numbering from UniProt ID Q9UBX2. Two helical regions are predicted within the C-terminal region, the first one (cyan helices) and the second one (salmon helix) both containing the amphipathic "ΦXXΦΦ" motif (Φ, bulky hydrophobic amino acid; X, any amino acid) found in several transcription factors reported to interact with KIX80-82. The position of the 9aaTAD (blue letters) and KBM (KIX binding motif; red letters) sequences are indicated by black bars. (b) Modelled interactions of the human KIX domain (PDB: 2LXT) with DUX4 9aaTAD (cyan) and KBM (salmon). (c) DUX4 protein-protein interactome. BioID -interactions shown with red lines and AP-MS -interactions with blue lines. If protein appeared in both data sets it is outlined in bold black. Known prey-prey interactions shown in grey (iREF).

## Extended Data Fig. 1

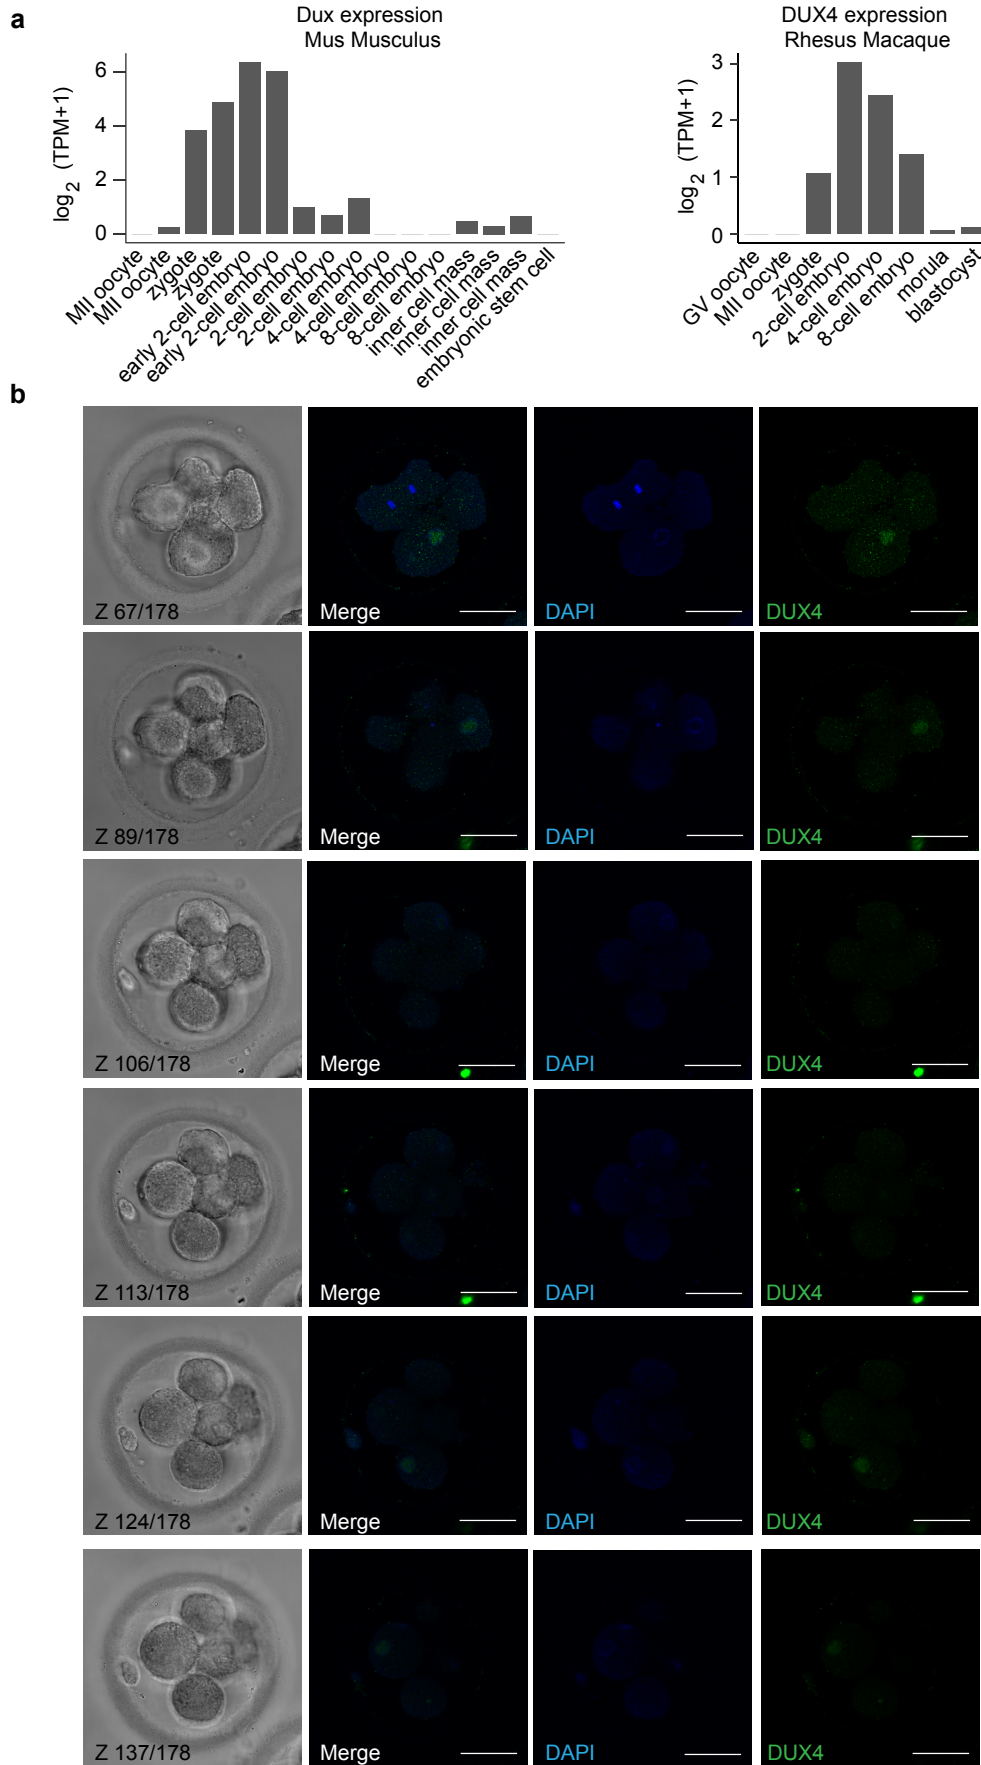

**Extended Data Figure 1. Conserved Dux/DUX4 expression in cleavage embryos.**

(a) Dux/DUX4 mRNA upregulation is conserved between mouse (on the left), Rhesus Macaque (on the right), and human (Fig.1b) zygotes. (b) Immunostaining of DUX4 (green) in an early 8-cell human embryo (n=1) shows heterogeneous DUX4 protein expression, consistent with observation of DUX4 clearance during the 8-cell stage. Nuclei counterstained with DAPI (blue). Six representative Z planes are shown.

## Extended Data Fig. 2

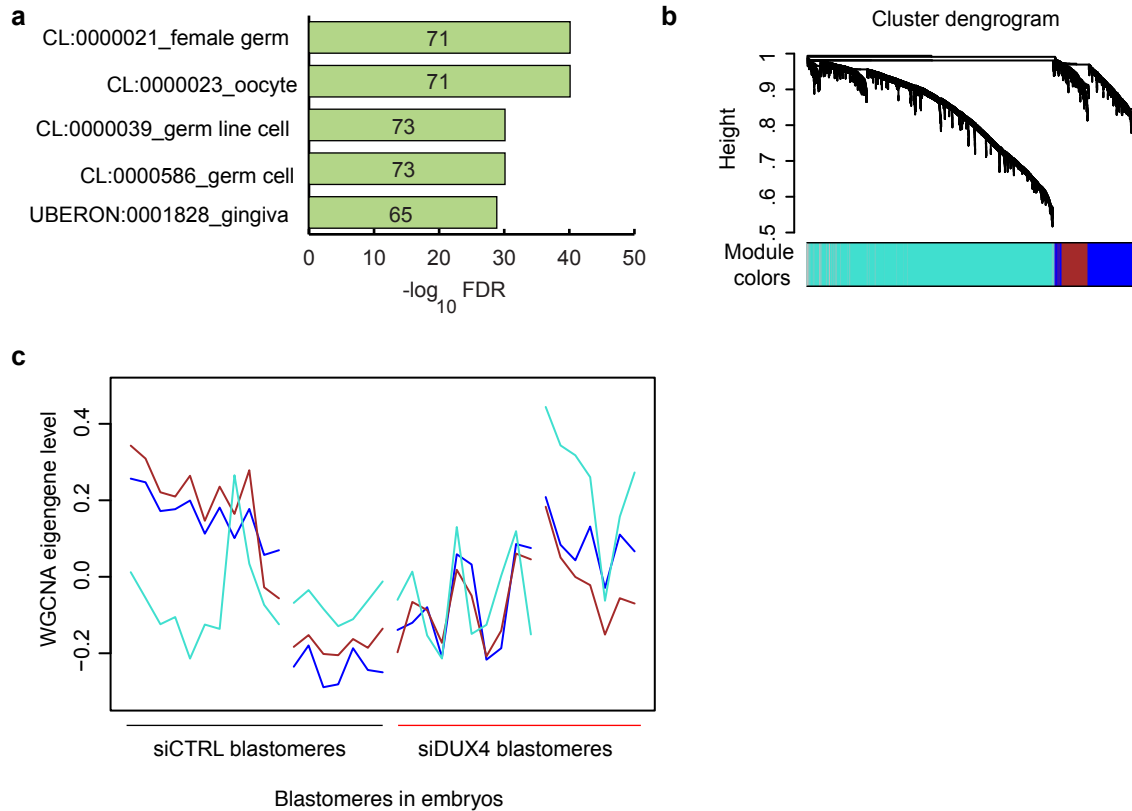

### Extended Data Figure 2. DUX4 knockdown leads to insufficient genome activation.

(a) Gene expression enrichment analysis for the genes that were retained in the siDUX4 embryos using TopAnat. (b) Hierarchical clustering and module assignment of the 3,196 variable TFEs between the siCTRL and siDUX4 embryos. A maternal (turquoise) and two embryo genome activation gene modules (blue and brown) were assigned. (c) Representative expression levels of each module as indicated in (b) by the siCTRL and siDUX4 blastomeres. (d) TFEs and annotations by modules and locations.



Extended Data Fig. 3

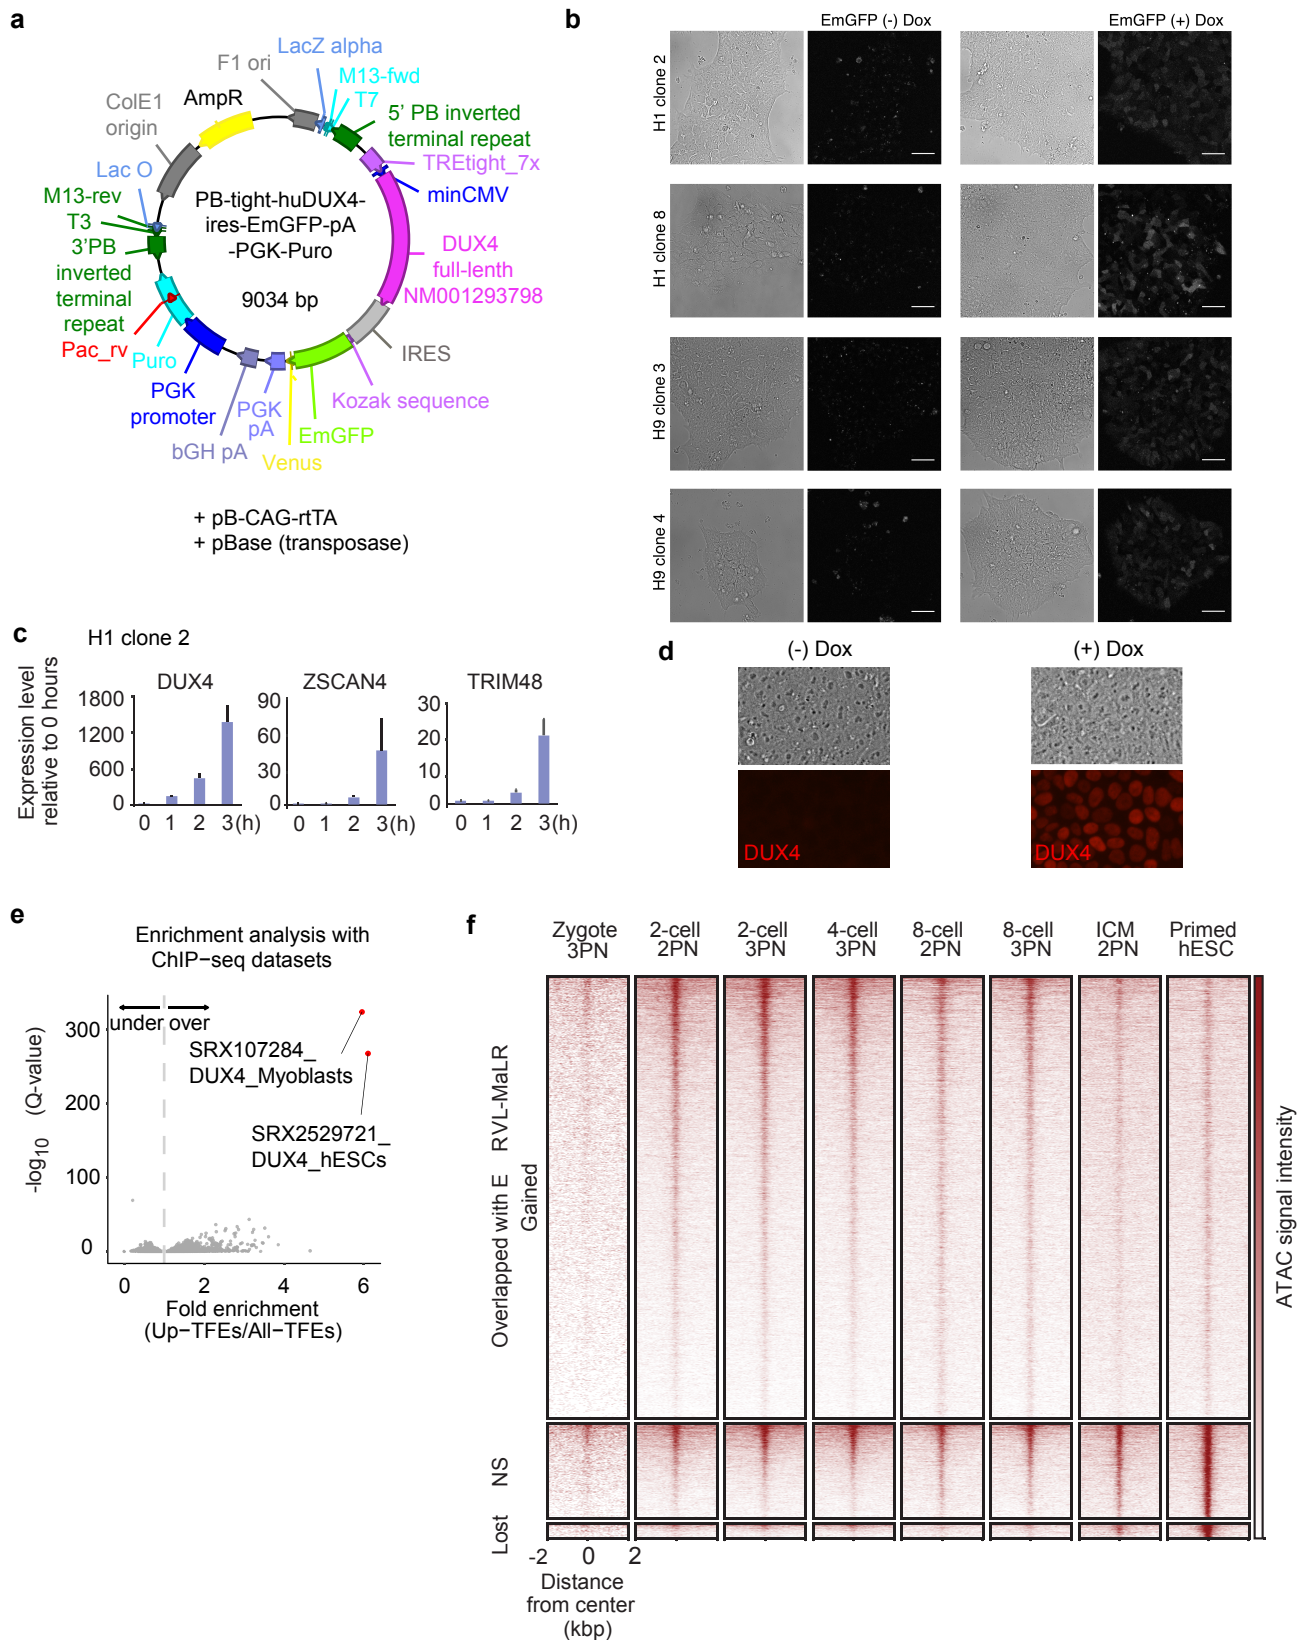

**Extended Data Figure 3. Induction of DUX4 in the DUX4 TetOn hESCs leads to expression of intergenic genome.**

(a) The DUX4-ires-EmGFP piggyBac vector used to establish the doxycycline inducible DUX4 TetOn hESCs in H1 (clones 2 and 8) and H9 (clones 3 and 4). (b) DUX4 TetOn hESC clones (as above) +/- 1  $\mu$ g/ml doxycycline for 3 h and live imaged for EmGFP. (c) mRNA expression kinetics of DUX4, ZSCAN4, and TRIM48 after 1 h, 2 h, and 3 h doxycycline induction measured using qRT-PCR. The data for the DUX4 TetOn H1 clone 2 is shown. Similar expression patterns were also found for the H1 clone 8, and H9 clones 3 and 4. (d) DUX4 TetOn hESCs treated with 1  $\mu$ g/ml doxycycline for 4 h, fixed, and immunostained for DUX4. Representative images for nuclear DUX4 staining are shown for the H1 clone 2. Similar staining pattern were seen for the H1 clone 8 and H9 clones 3 and 4. Scale bar 50  $\mu$ m. (e) Enrichment analysis of the DUX4-induced TFEs with 816 publicly available ChIP-seq datasets. A total of 7,216 ChIP-seq data for transcription factors are shown. ChIP-seq data for DUX4 are shown in red. Dots on the left side of the dashed line are underrepresented, whereas dots on the right side are overrepresented. (f) ATAC-seq intensity of human early embryo around the gained, non-significant (NS), and lost ATAC-seq peaks after DUX4 induction which overlap with ERVL-MaLR elements.

## Extended Data Fig.4

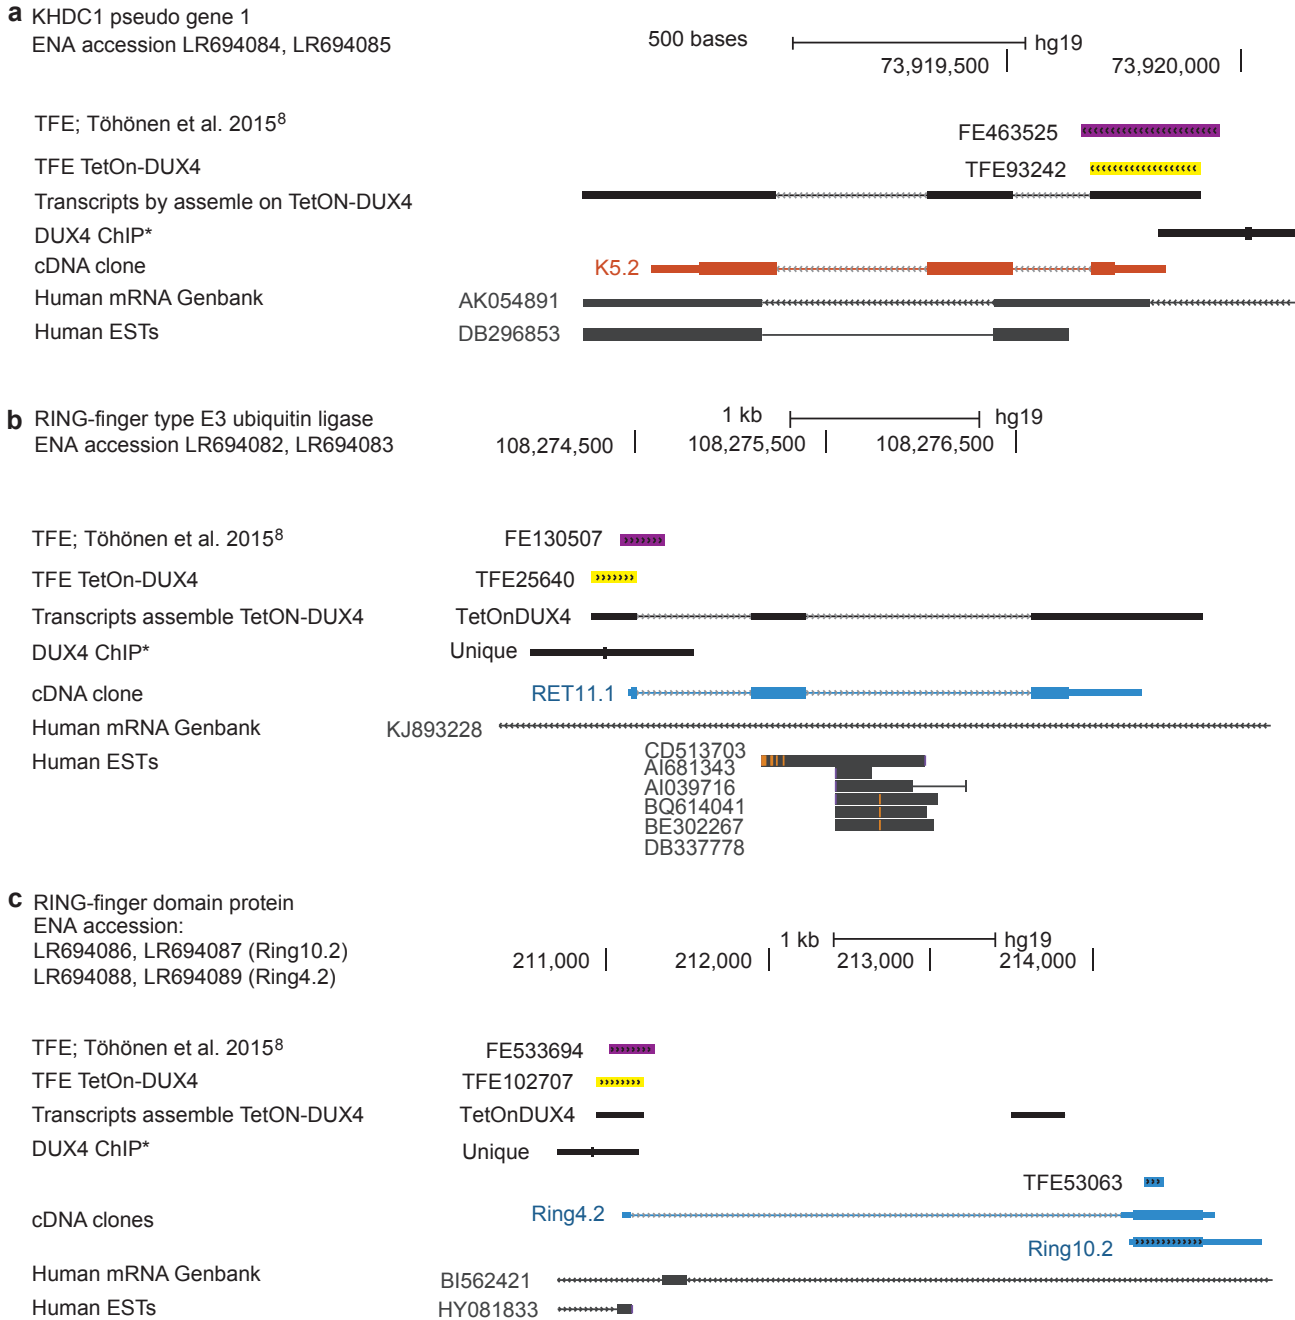

### Extended Data Figure 4. Previously unannotated putative DUX4 target genes cloned from cDNA of a human 4-cell embryo.

(a) Predicted KHDC1 pseudo gene 1 (clone K5.2), at chromosome 6 (73,918,461-824 73,920,115) was expressed by human 4-cell embryos (FE463525) and upregulated in TetOn DUX4 hESCs (TFE93242). TFes overlapped with DUX4 binding sites (DUX4 ChIP). cDNA clone K5.2 (thick orange regions indicate exons and grey thin regions indicate introns) corresponds to the KHDC1 pseudogene 1 transcript assembly in TetOn DUX4 cells. Transcript assemblies (mRNA Genbank and human ESTs), including unspliced, are shown. (b) Putative RING-finger type E3 ubiquitin ligase at chromosome 2 (108,273,771-831 108,277,850) was expressed by human 4-cell embryos (FE130507) and it was upregulated in TetOn-DUX4 hESCs (TFE25640). The DUX4 ChIP-seq peak overlapped with the TFes. RET11.1 was cloned from human 4-cell embryo (clone RET11.1). Thick blue regions indicate exons and thin grey regions indicate introns. Transcript assemblies (mRNA Genbank and human ESTs), including unspliced, are shown. (c) Putative RING-finger domain protein at chromosome 8 (210,701-215,100) was expressed by human 4-cell embryos (TFE533694) and induced in TetOn-DUX4 hESCs (TFE102707). ChIP-seq overlapped with the TFes. Two cDNA clones, Ring 4.2 and Ring 10.22, were expressed in the human 4-cell embryos. Thick blue regions indicate exons and grey thin regions indicate introns. Transcript assemblies (mRNA Genbank and human ESTs), including unspliced, are shown.

## Extended Data Fig. 5

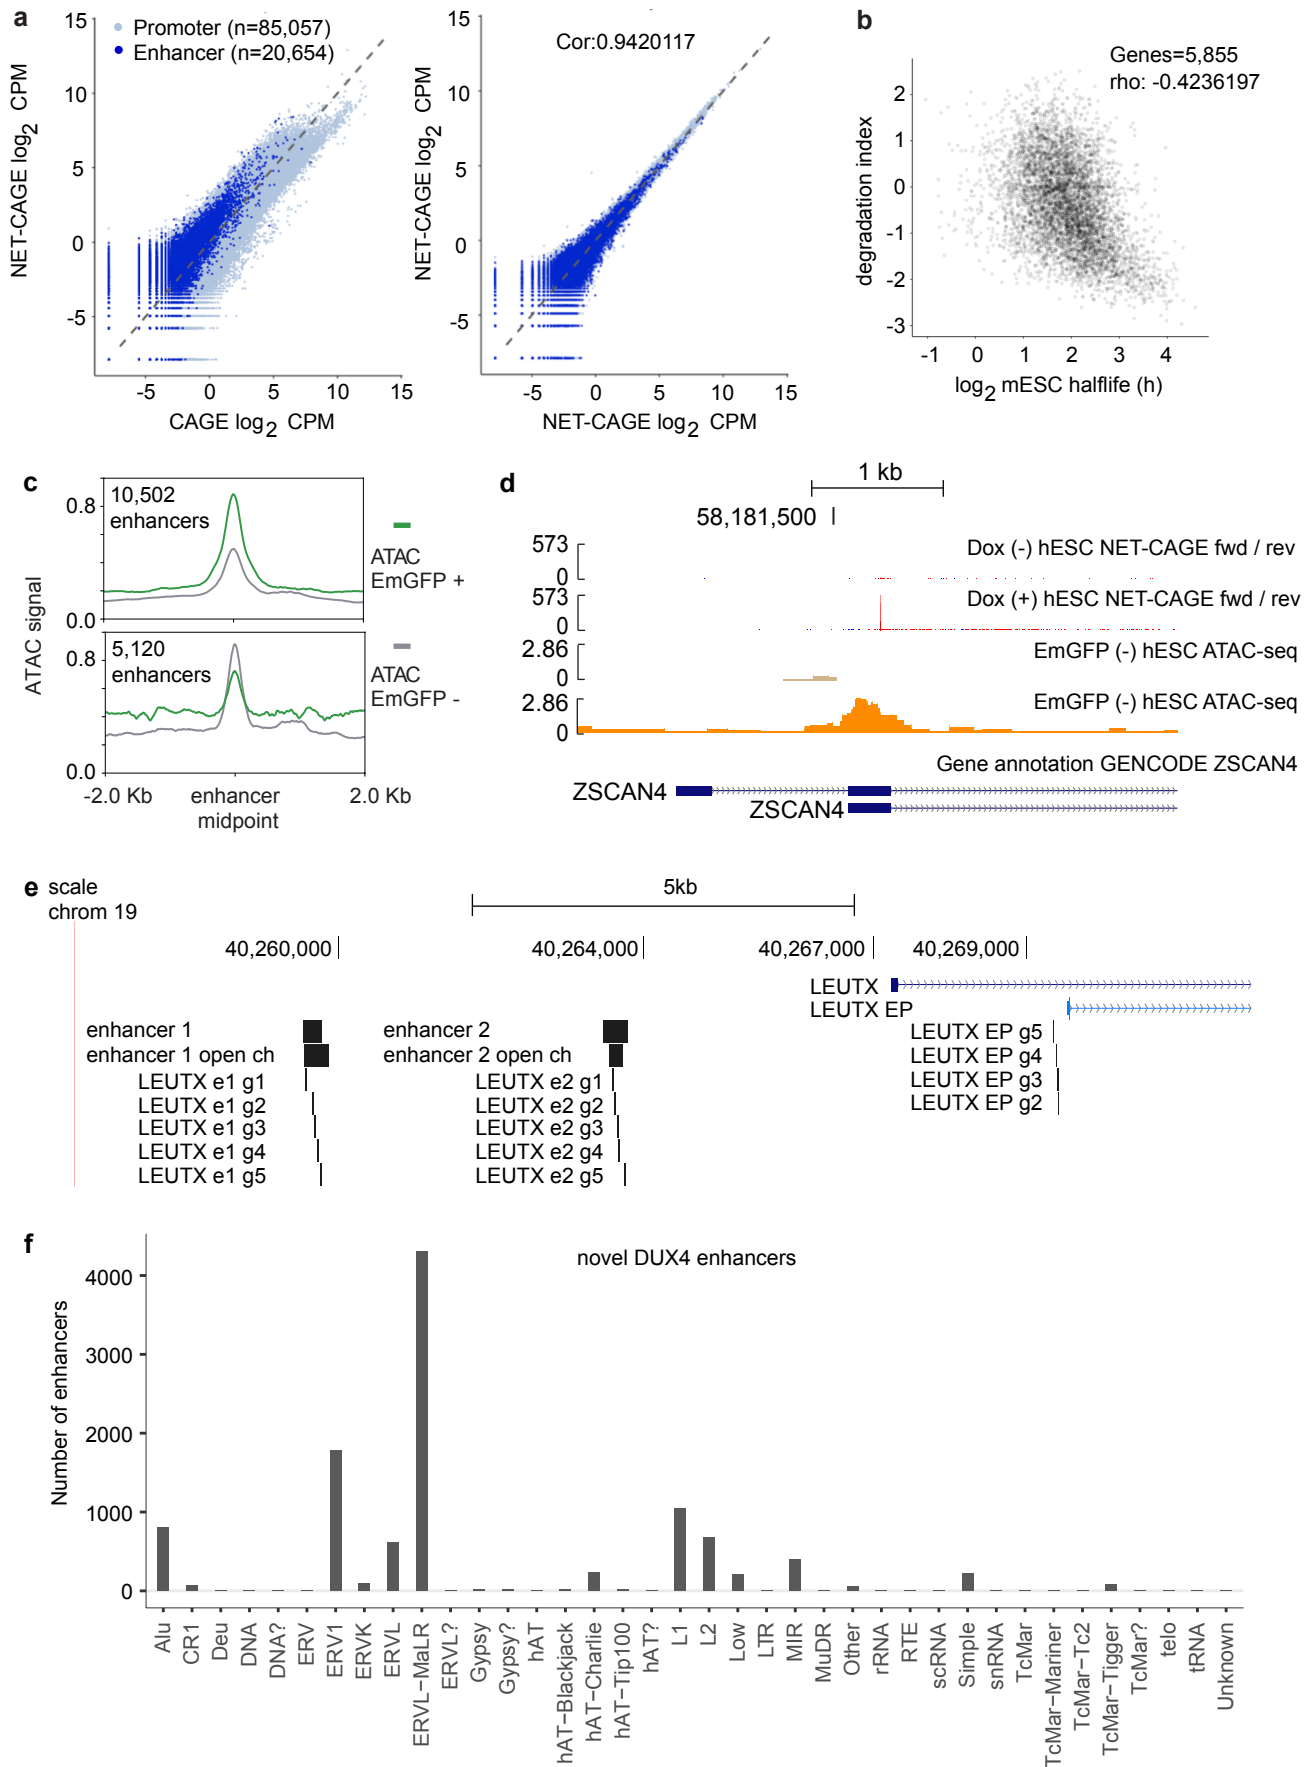

### Extended Data Figure 5. DUX4 activates novel enhancers.

(a) Comparison of CAGE and NET-CAGE data in DUX4 TetOn hESCs. Unstable nascent RNA transcripts, like enhancer RNAs, were detected with high sensitivity using NET-CAGE in comparison to CAGE. (b) Scatter plot of  $\log_2$  (half-lives) and degradation indices calculated as  $\log_2$  (NET-CAGE/CAGE) ratios in TetOn DUX4 hESC control sample and mouse embryonic stem cells. Each dot represents a gene. (c) Metagene plots showing ATAC-seq signal for the novel DUX4 enhancers and control only enhancers in the EmGFP (+) and EmGFP (-) cells. (d) UCSC browser view of the ZSCAN4 promoter identified using NET-CAGE. NET-CAGE signal shown in the DUX4 TetOn hESCs with and without Doxycycline treatment. Chromatin status (ATAC-seq signal) shown in the EmGFP (-) and EmGFP (+) cells. (e) Positions of the CRISPR guide RNAs used for LEUTX activation. e1, enhancer 1; e2, enhancer 2; g, guide; EP, embryo promoter; open ch, open chromatin. (f) Novel DUX4 enhancers overlapping with retroelement families. All families overlapping with at least one enhancer are shown.

## Extended Data Figure 6

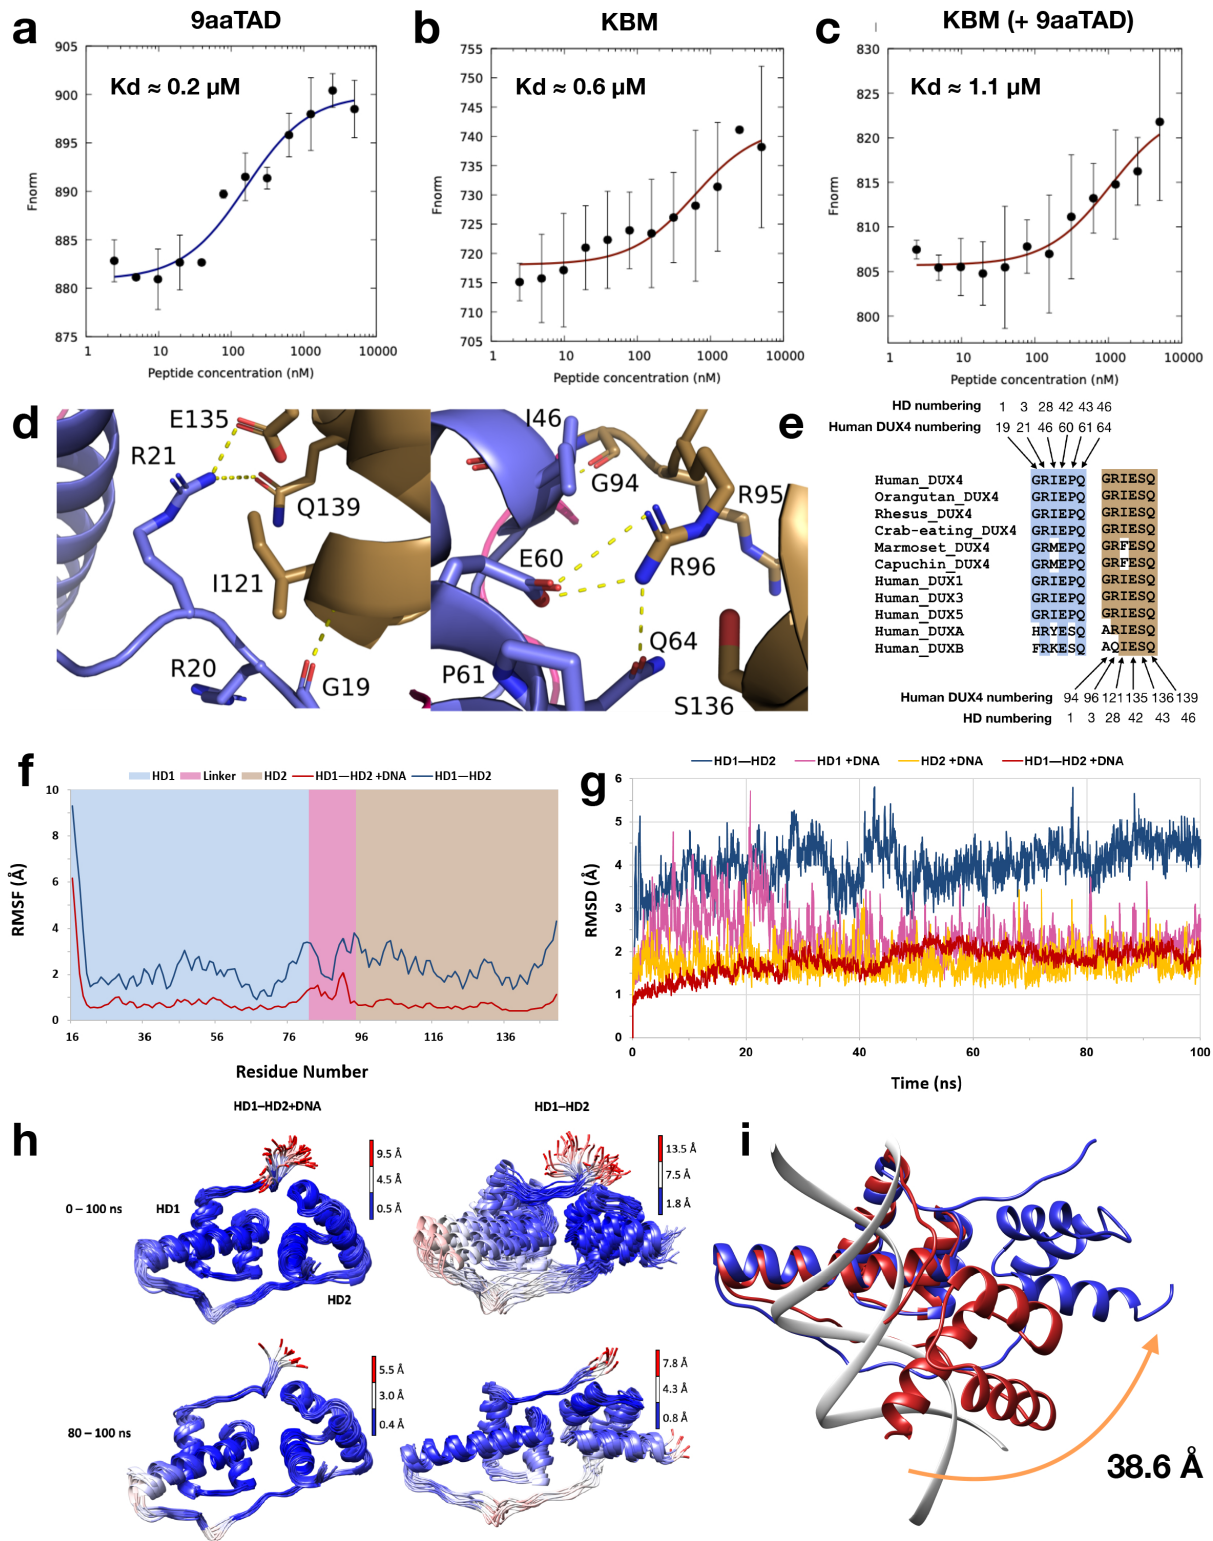

### Extended Data Figure 6. Interactions of DUX4. Microscale thermophoresis binding analysis of peptides to human KIX domain.

(a) 9aaTAD peptide (C370-Q386) (b) KBM peptide (E414-E423) (c) KBM binding to KIX with saturating 9aaTAD. (d) Inter-HD interactions stabilizing DUX4 HD1 and HD2 in absence of bound DNA (e) Sequence comparison of HD1-HD2 interacting residues seen in human DUX4 with other primates and other human double HD transcription factors. (f) RMSF (C $\alpha$  atoms) of X-ray structure of DUX4 with (red curve) and without (blue curve) bound DNA during a 100 ns MD simulation. HD1 (blue), linker (magenta) and HD2 (gold). (g) RMSD (backbone atoms) with reference to starting conformation) of X-ray structure of DUX4 HD1-HD2 with and without bound DNA, and separately for HD1 and for HD2 with bound DNA, during 100 ns MD simulations. (h) Superposed conformations of DUX4 with (left) and without (right) DNA, sampled during 100 ns (top) and final 20 ns (bottom) of the simulation. Chain traces are colored based on the C $\alpha$ -atom RMSD relative to the median structure at 50 ns or 90 ns. DNA-bound DUX4 shows higher stability than DNA-free DUX4; both exhibit larger fluctuations at the unconstrained N-termini and linker loops. A more stable conformation of DNA-free DUX4 exposing residues of the recognition helices was attained during the last 20 ns. (i) Final pose, DNA-free DUX4 (blue), after 100 ns simulation with HD1 superposed on HD1 of DNA-bound DUX4 X-ray structure (red and grey), revealing the degree of "opening" seen in the simulation; e.g. the C $\alpha$ -atom of R146 of the third helix of HD2 differs in relative position by 38.6 Å.



**Extended Data Table 7.** Supplementary table showing oligos that were used to (a) target LEUTX in a CRISPRa assay (b) measure expression levels of indicated genes in quantitative real-time PCR .

(a) Guide oligos for LEUTX promoter and enhancer. The guide RNA sequence is underlined. p:promoter; g:guide; enh:enhancer.

|              |                                                                                |
|--------------|--------------------------------------------------------------------------------|
| LEUTX_p_g2   | GTGGAAAGGACGAAACACCG <u>g</u> <u>gcgtggtattagggtaggac</u> GTTTTAGAGCTAGAAATAG  |
| LEUTX_p_g3   | GTGGAAAGGACGAAACACCG <u>g</u> <u>tattggagggcgtggtatta</u> GTTTTAGAGCTAGAAATAG  |
| LEUTX_p_g4   | GTGGAAAGGACGAAACACCG <u>g</u> <u>gatattgaatggattattgg</u> GTTTTAGAGCTAGAAATAG  |
| LEUTX_p_g5   | GTGGAAAGGACGAAACACCG <u>g</u> <u>ctgatctgtgtagggcact</u> GTTTTAGAGCTAGAAATAG   |
| LEUTXenh1_g1 | GTGGAAAGGACGAAACACCG <u>g</u> <u>ctgtcagtgagcttccggg</u> GTTTTAGAGCTAGAAATAG   |
| LEUTXenh1_g2 | GTGGAAAGGACGAAACACCG <u>g</u> <u>ttagctccaccccacctcc</u> GTTTTAGAGCTAGAAATAG   |
| LEUTXenh1_g3 | GTGGAAAGGACGAAACACCG <u>g</u> <u>ccaacctctaatacagctct</u> GTTTTAGAGCTAGAAATAG  |
| LEUTXenh1_g4 | GTGGAAAGGACGAAACACCG <u>g</u> <u>tcagatgagggctgctcac</u> GTTTTAGAGCTAGAAATAG   |
| LEUTXenh1_g5 | GTGGAAAGGACGAAACACCG <u>g</u> <u>catgtgaatgagatgactgg</u> GTTTTAGAGCTAGAAATAG  |
| LEUTXenh2_g1 | GTGGAAAGGACGAAACACCG <u>g</u> <u>gtcattatctcagtatctc</u> GTTTTAGAGCTAGAAATAG   |
| LEUTXenh2_g2 | GTGGAAAGGACGAAACACCG <u>g</u> <u>attaatccattaatccagtc</u> GTTTTAGAGCTAGAAATAG  |
| LEUTXenh2_g3 | GTGGAAAGGACGAAACACCG <u>g</u> <u>tgattaggttagagagct</u> GTTTTAGAGCTAGAAATAG    |
| LEUTXenh2_g4 | GTGGAAAGGACGAAACACCG <u>g</u> <u>gggatgagggcctaataca</u> GTTTTAGAGCTAGAAATAG   |
| LEUTXenh2_g5 | GTGGAAAGGACGAAACACCG <u>g</u> <u>atattcaaaagcataacaaga</u> GTTTTAGAGCTAGAAATAG |

(b) Oligos used for quantitative real-time PCR.

| Gene name     | Forward oligo 5' to 3' | Reverse oligo 5' to 3' |
|---------------|------------------------|------------------------|
| DUX4          | AGGAAGAATACCGGGCTCTG   | AGTCTCTCACCGGGCCTAG    |
| ZSCAN4        | CCTCCAGACTTCCCAAGAT    | TGTTCCAGCCATCTTGTTCA   |
| TRIM48        | CATCACTGGACTGAGGGACA   | TGACTGTTGGCTTCATTGTGA  |
| CYCLOPHILIN G | TCTTGTC AATGGCCAACAGAG | GCCCATCTAAATGAGGAGTTG  |
